# Supplementary material
Source: Elsevier journal article supplement (https://www.sciencedirect.com/science/article/pii/S002577531500593X)
Supplement: mmc1 [file S002577531500593X:mmc1.pdf]

## Lista de Comprobación de elaboración de GPC

### **ANEXO 1.**

#### **Lista de Comprobación del proceso de elaboración de Guías de Práctica Clínica (GPC)**

La lista de comprobación está organizada en 18 temas sobre el proceso de elaboración de Guías de Práctica Clínica (GPC), con los correspondientes apartados a considerar para cada tema. Las y los destinatarios de la lista de comprobación deben revisar todos los temas y los apartados antes de su aplicación, ya que no son necesariamente secuenciales y muchos están interconectados. Los breves ejemplos que se incluyen con algunos apartados son de aclaración y elaboración; su objetivo no es ser extensas instrucciones de cómo llevar a cabo los pasos. Las instrucciones y sugerencias para llevar a cabo los pasos, se pueden encontrar en los documentos originales que se hace referencia y en los recursos que se sugieren en la versión interactiva online de la lista de comprobación. ver en el Anexo 2 el glosario de términos y siglas que aparecen a lo largo de la lista de comprobación.

#### **Temas sobre elaboración de GPC**

1. Organización, presupuesto, planificación y capacitación
2. Establecimiento de prioridades
3. Miembros del Grupo Elaborador de la Guía (GEG)
4. Establecimiento de procesos del grupo de la guía
5. Identificación del público objetivo y selección de temas
6. Participación de usuarios y grupos de interés
7. Consideraciones sobre Conflicto de Intereses

## Lista de Comprobación de elaboración de GPC

8. Generación de preguntas (formato PICO)
9. Consideración de valores y preferencias
10. Decisión sobre la evidencia a incluir y búsqueda de la evidencia
11. Síntesis de la evidencia y consideración de información adicional
12. Juicio de la calidad, fuerza o certidumbre del conjunto de la evidencia
13. Desarrollo de las recomendaciones y determinación de su fuerza
14. Redacción de las recomendaciones y consideraciones de implementación, factibilidad y equidad
15. Presentación y revisión por pares
16. Difusión e implementación
17. Evaluación y utilización
18. Actualización

## Lista de Comprobación de elaboración de GPC

| Completado                                                | No                       | Etapas de Elaboración de Guías de Práctica Clínica (GPC)                                                                                                                                                                                                                                                                                                                                                                                                                                                                      | Fuente(s)                        |
|-----------------------------------------------------------|--------------------------|-------------------------------------------------------------------------------------------------------------------------------------------------------------------------------------------------------------------------------------------------------------------------------------------------------------------------------------------------------------------------------------------------------------------------------------------------------------------------------------------------------------------------------|----------------------------------|
| 1. Organización, presupuesto, planificación, capacitación |                          |                                                                                                                                                                                                                                                                                                                                                                                                                                                                                                                               |                                  |
| <input type="checkbox"/>                                  | <input type="checkbox"/> | 1. Establecer la estructura del grupo elaborador de la guía (GEG) y determinar los roles, tareas, y relaciones entre los diversos grupos involucrados (ej., comité de supervisión/comisión para seleccionar los temas y miembros del grupo, grupo de trabajo constituido por personas expertas en clínica y metodología para sintetizar la evidencia, personal para tareas o apoyo administrativo, panel de la guía para elaborar recomendaciones, grupos de interés, y usuarios para consultas ) (véase los temas 3, 4, y 6) | 1-15                             |
| <input type="checkbox"/>                                  | <input type="checkbox"/> | 2. Realizar una evaluación exhaustiva de la propuesta del proyecto de elaboración de la GPC sobre aspectos de financiación y factibilidad relacionadas con el GEG (ej. Disponibilidad de recursos para completar el proyecto, compromisos esperados del panel de la guía y personal, etc.)                                                                                                                                                                                                                                    | 2-8,11,15-21                     |
| <input type="checkbox"/>                                  | <input type="checkbox"/> | 3. Obtener la aprobación de la organización para proceder con el proyecto de la guía                                                                                                                                                                                                                                                                                                                                                                                                                                          | 4-<br><br>7,10,11,13,17,19,20,22 |
| <input type="checkbox"/>                                  | <input type="checkbox"/> | 4. Preparar un presupuesto para la elaboración de la GPC, estableciendo el coste estimado para                                                                                                                                                                                                                                                                                                                                                                                                                                | 7,16,19,23,24                    |

## Lista de Comprobación de elaboración de GPC

|                          |                          |                                                                                                                                                                                                                                                                                                                                           |                           |
|--------------------------|--------------------------|-------------------------------------------------------------------------------------------------------------------------------------------------------------------------------------------------------------------------------------------------------------------------------------------------------------------------------------------|---------------------------|
|                          |                          | cada etapa (ej. remuneración del grupo de trabajo y del personal, financiación comisionada de ciertas tareas a organizaciones o grupos externos, gastos de viaje, de publicación y difusión, etc.)                                                                                                                                        |                           |
| <input type="checkbox"/> | <input type="checkbox"/> | 5. Determinar si los miembros del panel de la guía recibirán una remuneración por su tiempo o si trabajaran de forma voluntaria.                                                                                                                                                                                                          | 3,10,18,23                |
| <input type="checkbox"/> | <input type="checkbox"/> | 6. Obtener o asegurar financiación para la elaboración de la guía, poniendo especial atención a consideraciones sobre conflicto de intereses. (véase el Tema 7)                                                                                                                                                                           | 3,4,6,7,9,20,25,26        |
| <input type="checkbox"/> | <input type="checkbox"/> | 7. Perfilar y organizar el apoyo administrativo necesario para facilitar el proceso de desarrollo de la guía (ej. secretaría del grupo de trabajo para organizar y obtener la declaración de conflicto de intereses, organizar reuniones del grupo, etc.)                                                                                 | 2-9,19,21                 |
| <input type="checkbox"/> | <input type="checkbox"/> | 8. Planificar y preparar la capacitación y apoyo necesario para las personas involucradas en el proceso de desarrollo de la guía (ej. formación relacionada con el conflicto de intereses, sesiones de capacitación para miembros del panel de la guía y pacientes que se incorporarán al grupo de la guía, etc.) (véase los Temas 4 y 6) | 1,2,5-7,14,15,22,23,27-29 |
| <input type="checkbox"/> | <input type="checkbox"/> | 9. Definir un cronograma para la finalización de la guía y plazos para completar los hitos en el                                                                                                                                                                                                                                          | 2,4-10,13,16,17,19-21     |

## Lista de Comprobación de elaboración de GPC

|                                          |                          |                                                                                                                                                                                                                                                                                                                                                                                                                                                                                                                                                                                                                                         |                                   |
|------------------------------------------|--------------------------|-----------------------------------------------------------------------------------------------------------------------------------------------------------------------------------------------------------------------------------------------------------------------------------------------------------------------------------------------------------------------------------------------------------------------------------------------------------------------------------------------------------------------------------------------------------------------------------------------------------------------------------------|-----------------------------------|
|                                          |                          | proceso de desarrollo de la guía.                                                                                                                                                                                                                                                                                                                                                                                                                                                                                                                                                                                                       |                                   |
| <input type="checkbox"/>                 | <input type="checkbox"/> | 10. Determinar, si las hubiera, qué consideraciones legales son relevantes para la guía planificada, (ej. políticas de reembolso para medicamentos huérfanos)                                                                                                                                                                                                                                                                                                                                                                                                                                                                           | 4-7,19,20,22,23,30,31             |
| <input type="checkbox"/>                 | <input type="checkbox"/> | 11. Elaborar un protocolo para toda la guía, que pueda ser completado durante el desarrollo del proyecto con el fin de mantener el GEG al día, incluyendo un resumen de los objetivos generales y los objetivos de la guía, el cronograma, la asignación de tareas, etapas que requieren documentación de las decisiones y la metodología propuesta para todas las etapas (es decir, los incluidos en esta lista de comprobación, por ejemplo, los métodos para conformar el grupo de la guía, selección de temas a tratar en la guía, métodos de consenso, métodos de consulta, métodos de búsqueda y selección de la evidencia, etc.) | 3,5,7-11,13-15,19,22,26, 27,32-34 |
| <b>2. Establecimiento de prioridades</b> |                          |                                                                                                                                                                                                                                                                                                                                                                                                                                                                                                                                                                                                                                         |                                   |
| <input type="checkbox"/>                 | <input type="checkbox"/> | 1. Decidir sobre un proceso para el establecimiento de prioridades de los temas necesarios y designar al responsable de dirigir el proceso (ej. prioridades establecidas por el comité de supervisión de la organización patrocinadora, prioridades planteadas por los ministerios de sanidad o por las asociaciones de profesionales).                                                                                                                                                                                                                                                                                                 | 4-14,16,18,19,24,35,36            |
| <input type="checkbox"/>                 | <input type="checkbox"/> | 2. Aplicar un proceso sistemático y transparente con criterios específicos para la propuesta de                                                                                                                                                                                                                                                                                                                                                                                                                                                                                                                                         | 3-6,8-                            |

## Lista de Comprobación de elaboración de GPC

|                          |                          |                                                                                                                                                                                                                                                                                                    |                                   |
|--------------------------|--------------------------|----------------------------------------------------------------------------------------------------------------------------------------------------------------------------------------------------------------------------------------------------------------------------------------------------|-----------------------------------|
|                          |                          | temas para la guía durante el establecimiento de prioridades (ej. alta prevalencia y carga de enfermedad, mortalidad y morbilidad evitables, alto coste, enfermedades emergentes u opciones de atención emergentes, variabilidad en la práctica clínica, evidencia que cambia rápidamente, etc.).  | 14,16,18,19,24,35,36              |
| <input type="checkbox"/> | <input type="checkbox"/> | 3. Incorporar grupos de interés relevantes en el proceso de establecimiento de prioridades y la selección de temas para la guía (ej. profesionales clínicos, asociaciones profesionales, responsables de decisiones de políticas en salud, financiadores, el público). (véase el Tema 6)           | 1,5-8,10,12-16,19,35              |
| <input type="checkbox"/> | <input type="checkbox"/> | 4. Considerar y decidir cómo se tendrán en cuenta las diferentes perspectivas sobre la importancia y los recursos necesarios para la implementación de las recomendaciones de la guía (ej. pacientes, financiadores, profesionales de la medicina, programas de salud pública). (véase el Tema 11) | 3,5,8,10,12,16,18-20,26, 31,34,37 |
| <input type="checkbox"/> | <input type="checkbox"/> | 5. Buscar guías actualizadas existentes que cubran el tema propuesto y evaluar su credibilidad (ej. AGREE II). Determinar si estas pueden adaptarse o si se debe desarrollar una guía completamente nueva. (véase también el tema 10)                                                              | 3-14,16,18,19,37,38               |
| <input type="checkbox"/> | <input type="checkbox"/> | 6. Analizar la necesidad o la oportunidad de asociarse con otras organizaciones que elaboran                                                                                                                                                                                                       | 7,8,13,19,23,24,39                |

## Lista de Comprobación de elaboración de GPC

|                                                          |                          |                                                                                                                                                                                                                                                                                                                                                                     |                                       |
|----------------------------------------------------------|--------------------------|---------------------------------------------------------------------------------------------------------------------------------------------------------------------------------------------------------------------------------------------------------------------------------------------------------------------------------------------------------------------|---------------------------------------|
|                                                          |                          | guías para determinar si existe la posibilidad de asociarse o realizar un esfuerzo conjunto para la elaboración de la guía completa o de alguna parte de la misma.                                                                                                                                                                                                  |                                       |
| <input type="checkbox"/>                                 | <input type="checkbox"/> | 7. Realizar un ejercicio exploratorio sobre el alcance del tema propuesta para la guía en relación a aspectos de implementación y barreras para el cambio (ej. si es probable que la guía desarrollada mejore los resultados de salud, si la implementación de las recomendaciones de salud es factible, si los recursos están disponibles, etc.)                   | 3-9,11,13-16,18-20,23,26,31,34,40     |
| <input type="checkbox"/>                                 | <input type="checkbox"/> | 8. Seleccionar o proporcionar un método de consenso para utilizar durante el establecimiento de prioridades y la selección de temas de la guía (ej. votación, método de consenso Delphi). (véase el Tema 4)                                                                                                                                                         | 4-6,13,16,19,35                       |
| <input type="checkbox"/>                                 | <input type="checkbox"/> | 9. Documentar el proceso de establecimiento de prioridades y la selección del tema de la guía para garantizar la transparencia.                                                                                                                                                                                                                                     | 4-6,11,13,16,19,35                    |
| <b>3. Miembros del Grupo Elaborador de la Guía (GEG)</b> |                          |                                                                                                                                                                                                                                                                                                                                                                     |                                       |
| <input type="checkbox"/>                                 | <input type="checkbox"/> | 1. Buscar representación multidisciplinar para el GEG, incluyendo a miembros de entre el público objetivo, pacientes y cuidadores, profesionales de primera línea, personas expertas en el tema, en metodología y en economía de la salud, para que puedan cumplir las funciones requeridas (ej. para el grupo de trabajo, el panel de la guía) . (véase también el | 1,3-7,9-11,13-15,18-24,26,36,38,41,42 |

## Lista de Comprobación de elaboración de GPC

|                          |                          |                                                                                                                                                                                                                                                                                                                                                                                                                                                                                           |                                           |
|--------------------------|--------------------------|-------------------------------------------------------------------------------------------------------------------------------------------------------------------------------------------------------------------------------------------------------------------------------------------------------------------------------------------------------------------------------------------------------------------------------------------------------------------------------------------|-------------------------------------------|
|                          |                          | Tema 6).                                                                                                                                                                                                                                                                                                                                                                                                                                                                                  |                                           |
| <input type="checkbox"/> | <input type="checkbox"/> | 2. Decidir sobre los métodos para el reclutamiento e incorporación de miembros del GEG (ej. la publicidad generalizada de empleos, nombramiento competitivo mediante entrevistas, etc.)                                                                                                                                                                                                                                                                                                   | 1,2,5,6,9-<br>11,13,19,23,24, 42          |
| <input type="checkbox"/> | <input type="checkbox"/> | 3. Alcanzar un equilibrio adecuado a la temática entre el nivel de experiencia y una representación apropiada para el panel de la guía (ej. profesionales de la medicina especializada y de atención primaria que forman parte de la público objetivo, distribución de género y geográfica de los miembros del panel), que puede ser iterativo en el caso que se requieran miembros adicionales porque el público objetivo y los temas de la guía hayan sido refinados. (véase el Tema 5) | 1-8,10,13-<br>15,19,23,24,26,<br>36,38,42 |
| <input type="checkbox"/> | <input type="checkbox"/> | 4. Considerar el tamaño óptimo de grupo para el GEG, particularmente para el panel de la guía (ej. un grupo muy pequeño puede carecer de experiencia, dominio de los contenidos y una representación amplia, un grupo demasiado grande puede carecer de cohesión e interacción efectiva de grupo).                                                                                                                                                                                        | 1,2,4-7,9,13-<br>15,19,22,23, 36,42       |
| <input type="checkbox"/> | <input type="checkbox"/> | 5. Definir los roles de los miembros del grupo de la guía y las tareas de las que serán responsables (ej. conformar un equipo redactor, responsable(s) de redacción de actas de las                                                                                                                                                                                                                                                                                                       | 1,2,4-10,13-<br>15,19,21,23, 36,38,42     |



## Lista de Comprobación de elaboración de GPC

|                                                           |                          |                                                                                                                                                                                                                                                                                             |                                  |
|-----------------------------------------------------------|--------------------------|---------------------------------------------------------------------------------------------------------------------------------------------------------------------------------------------------------------------------------------------------------------------------------------------|----------------------------------|
|                                                           |                          | reuniones y de documentar las decisiones tomadas, proporcionar consulta metodológica, realizar las revisiones sistemáticas y obtención de otra evidencia, proporcionar la perspectiva de los pacientes y la perspectiva de los médicos especialistas, etc.).                                |                                  |
| <input type="checkbox"/>                                  | <input type="checkbox"/> | 6. Seleccionar una o varias personas encargadas del grupo, o coordinadores, con experiencia en facilitación de grupos, que mantengan una dinámica constructiva, identificando y resolviendo conflictos, siendo neutrales y objetivos, que tengan conocimientos en metodología y contenidos. | 1,2,4-9,13-15,19,22-24,36, 38,42 |
| <input type="checkbox"/>                                  | <input type="checkbox"/> | 7. Documentar el proceso de selección de los miembros del grupo de la guía y los roles para garantizar transparencia.                                                                                                                                                                       | 1,2,5-8,13,19,20,22,26,42        |
| <b>4. Establecimiento de procesos grupales de la guía</b> |                          |                                                                                                                                                                                                                                                                                             |                                  |
| <input type="checkbox"/>                                  | <input type="checkbox"/> | 1. Establecer el modo y la frecuencia con la que se llevará a cabo la comunicación con miembros del panel de la guía y otros grupos, quién será el responsable de la organización, y considerar cuándo desviarse de este enfoque/planteamiento.                                             | 1,2,4-6,8,9,13,15,19,23,42       |
| <input type="checkbox"/>                                  | <input type="checkbox"/> | 2. Establecer expectativas y crear conciencia sobre el proceso grupal a través una introducción, capacitación y apoyo a miembros del GEG (ej. establecimiento de condiciones ideales para la discusión grupal y toma de decisiones)                                                         | 1,2,4,6-9,14,18,22,23,36,43      |

## Lista de Comprobación de elaboración de GPC

|                          |                          |                                                                                                                                                                                                                                                                                                                               |                                  |
|--------------------------|--------------------------|-------------------------------------------------------------------------------------------------------------------------------------------------------------------------------------------------------------------------------------------------------------------------------------------------------------------------------|----------------------------------|
| <input type="checkbox"/> | <input type="checkbox"/> | 3. Como parte de la capacitación del GEG, asegurarse de que los miembros entienden cuál será el proceso y los métodos propuestos y que estos tienen que ser respetados (ej. métodos de consenso que se puedan utilizar, votación anónima o no anónima, evaluación de la evidencia, discusión grupal y contribución de ideas). | 1,2,4,6-<br>9,14,15,18,23,32, 43 |
| <input type="checkbox"/> | <input type="checkbox"/> | 4. Tratar de establecer las condiciones óptimas para proporcionar a los miembros del grupo igualdad de oportunidades de contribuir y de que sus ideas y argumentos sean consideradas apropiadamente (ej. durante la discusión grupal, toma de decisiones y en la formulación de recomendaciones)                              | 1,2,6-9,13,18,22,23,32,<br>36,43 |
| <input type="checkbox"/> | <input type="checkbox"/> | 5. Establecer métodos para manejar las discrepancias o disputas entre los miembros del grupo y el funcionamiento inapropiado del proceso grupal.                                                                                                                                                                              | 2,7-9,13,15,18,32,43             |
| <input type="checkbox"/> | <input type="checkbox"/> | 6. Proporcionar oportunidades para el debate y retroalimentación sobre el proceso grupal durante todo el proyecto de desarrollo de la guía.                                                                                                                                                                                   | E*, 6                            |
| <input type="checkbox"/> | <input type="checkbox"/> | 7. Establecer un método para la organización, distribución a tiempo y archivo de documentos utilizados y producidos en el desarrollo de la guía.                                                                                                                                                                              | 2,5,8,9,14,15                    |
| <input type="checkbox"/> | <input type="checkbox"/> | 8. Establecer un quórum para las reuniones (ej. 75% del grupo debe estar presente para formular recomendaciones de las guías), pero esperar que todos los miembros del grupo                                                                                                                                                  | 4,5,8,13,19                      |

## Lista de Comprobación de elaboración de GPC

|                                                                    |                          |                                                                                                                                                                                                                                                                                                 |                                                  |
|--------------------------------------------------------------------|--------------------------|-------------------------------------------------------------------------------------------------------------------------------------------------------------------------------------------------------------------------------------------------------------------------------------------------|--------------------------------------------------|
|                                                                    |                          | asistan a todas las reuniones en la medida de lo posible.                                                                                                                                                                                                                                       |                                                  |
| <input type="checkbox"/>                                           | <input type="checkbox"/> | 9. Establecer o planificar los horarios y ubicaciones (virtuales o presenciales) de las reuniones por adelantado y establecer el alcance y la agenda específica para cada reunión.                                                                                                              | 1,2,4,5,7,9,13-<br>15,18,19,42                   |
| <input type="checkbox"/>                                           | <input type="checkbox"/> | 10. Mantener un registro de todas las reuniones, incluyendo las actas y determinar si hacerlo o no público, o internamente disponible (ej. quienes asistieron, cuál fue el programa del día, qué decisiones se tomaron, cuáles serán los próximos pasos).                                       | 2,4,5,8,15,42                                    |
| <b>5. Identificación del Público objetivo y Selección de Temas</b> |                          |                                                                                                                                                                                                                                                                                                 |                                                  |
| <input type="checkbox"/>                                           | <input type="checkbox"/> | 1. Identificar, definir y / o revisar el público principal (ej. profesionales de atención primaria, profesionales de gestión de programas de salud) y secundario (ej. administradores de hospitales) para la guía y determinar el número de poblaciones que pueden ser consideradas en la guía. | 4,5,7,8,11,14,15,18,19,<br>22, 26,34,36,38,41,44 |
| <input type="checkbox"/>                                           | <input type="checkbox"/> | 2. Consultar a grupos de interés adecuados sobre el público(s) objetivo identificado para asegurar que guarda relación con la temática de la guía y que se hayan incluido todos los públicos relevantes. (véase el Tema 6)                                                                      | 4,14,15,41                                       |
| <input type="checkbox"/>                                           | <input type="checkbox"/> | 3. Establecer un procedimiento y criterios para generar y priorizar una lista de posibles temas que se abordarán en la guía (ej. en los que la evidencia es más confusa o controvertida, en                                                                                                     | 3-10,12-<br>15,18,19,23,35,                      |

## Lista de Comprobación de elaboración de GPC

|                                                         |                          |                                                                                                                                                                                                                                                                                                                                                            |                                                     |
|---------------------------------------------------------|--------------------------|------------------------------------------------------------------------------------------------------------------------------------------------------------------------------------------------------------------------------------------------------------------------------------------------------------------------------------------------------------|-----------------------------------------------------|
|                                                         |                          | los que actualmente existe incertidumbre o variabilidad en la práctica, preguntas sobre cribado, diagnóstico y tratamiento, etc .).                                                                                                                                                                                                                        | 38,44,45                                            |
| <input type="checkbox"/>                                | <input type="checkbox"/> | 4. Consultar a grupos de interés adecuados para asegurar que todos los temas relevantes para la guía han sido identificados y que las necesidades del público(s) objetivo serán satisfechas. (véase el Tema 6)                                                                                                                                             | 4-6,12-15,19,23,35,46                               |
| <input type="checkbox"/>                                | <input type="checkbox"/> | 5. Seleccionar o proporcionar un método de consenso para que el grupo lo utilice en la etapa de establecimiento de acuerdos acerca de los temas finalmente seleccionados para tratar en la guía (ej. método Delphi, técnica de grupo nominal).                                                                                                             | 5,9,19,35                                           |
| <input type="checkbox"/>                                | <input type="checkbox"/> | 6. Para garantizarla transparencia, documentar, documentar los procesos de identificación del público(s) objetivo y la selección de temas para la guía.                                                                                                                                                                                                    | 13-<br>15,19,26,34,35,41,44                         |
| <b>6. Participación de usuarios y grupos de interés</b> |                          |                                                                                                                                                                                                                                                                                                                                                            |                                                     |
| <input type="checkbox"/>                                | <input type="checkbox"/> | 1. Determinar quiénes serán las personas y grupos de interés apropiados, para implicarlos y consultarles durante la elaboración de la GPC, y así incorporar las opiniones de todos los interesados que puedan verse afectados por la guía (ej. grupos de profesionales, administradores de salud, responsables políticos, representantes de la industria). | 1,3,6,9,11,13-15,18-<br>20,22,<br>23,26,28,29,31,38 |

## Lista de Comprobación de elaboración de GPC

|                          |                          |                                                                                                                                                                                                                                                                                                                                                                                                                                                                                                               |                                                   |
|--------------------------|--------------------------|---------------------------------------------------------------------------------------------------------------------------------------------------------------------------------------------------------------------------------------------------------------------------------------------------------------------------------------------------------------------------------------------------------------------------------------------------------------------------------------------------------------|---------------------------------------------------|
| <input type="checkbox"/> | <input type="checkbox"/> | 2. Definir quiénes serán las y los usuarios apropiados para implicarles y consultarles durante la elaboración de la GPC (ej. pacientes individuales, personas que prestan cuidados y apoyo no remunerado a pacientes, miembros del público general como pacientes potenciales y como financiadores de servicios de salud a través de los impuestos, organizaciones comunitarias que representan los intereses de los pacientes y defensores que representan los intereses de los pacientes y los cuidadores). | 1,6,7,9,11,14,15,20,22,23, 26,28,29,36,38,46      |
| <input type="checkbox"/> | <input type="checkbox"/> | 3. Establecer métodos para la participación de usuarios y grupos de interés y mantener un registro de los grupos de interés para la guía (ej. inscripción de usuarios y grupos de interés para que participen directamente en el panel de la guía, anunciar convocatorias de reuniones o talleres separados de usuarios y grupos de interés, distribución electrónica de documentos y retroalimentación, periodo abierto para la revisión de documentos y retroalimentación).                                 | 1,5,6,9,11,13-15,18-20,22,23,28,29,31,36,38,42,46 |
| <input type="checkbox"/> | <input type="checkbox"/> | 4. Proporcionar información (ej. capacitación y sesiones de orientación) para usuarios y grupos de interés que participen directamente en el panel de la guía para aclarar las funciones y maximizar sus contribuciones (ej. la evaluación objetiva de la evidencia, evitando las recomendaciones basadas en intereses propios).                                                                                                                                                                              | 1,6,15,22,23,28,31,36,46                          |
| <input type="checkbox"/> | <input type="checkbox"/> | 5. Determinar las funciones, tareas y plazos para las consultas con los usuarios y grupos de                                                                                                                                                                                                                                                                                                                                                                                                                  | 1,6,11,14,15,18,20,23,2                           |

## Lista de Comprobación de elaboración de GPC

|                          |                          |                                                                                                                                                                                                                                                                                                                                                                                                                                                                                                             |                 |
|--------------------------|--------------------------|-------------------------------------------------------------------------------------------------------------------------------------------------------------------------------------------------------------------------------------------------------------------------------------------------------------------------------------------------------------------------------------------------------------------------------------------------------------------------------------------------------------|-----------------|
|                          |                          | interés que no participan directamente en el panel de la guía (ej. en momentos específicos durante el proceso de desarrollo de la guía que incluyan oportunidades para comentar sobre el proceso de priorización, el alcance de la guía, la identificación de público objetivo, la identificación de desenlaces importantes para los pacientes, la identificación de evidencia adicional, señalar consecuencias que el panel de la guía no ha tenido en cuenta, revisar el borrador final de la guía, etc.) | 8, 31,36,38,47  |
| <input type="checkbox"/> | <input type="checkbox"/> | 6. Desarrollar o adoptar plantillas estándar para las contribuciones y comentarios de usuarios y grupos de interés durante la consulta, con instrucciones claras o módulos de capacitación para asegurar una participación efectiva.                                                                                                                                                                                                                                                                        | 5,6,13,15,31    |
| <input type="checkbox"/> | <input type="checkbox"/> | 7. Ofrecer tiempo suficiente para el proceso de consulta y comentarios al respecto por parte de usuarios y grupos de interés.                                                                                                                                                                                                                                                                                                                                                                               | 13,15,28,31     |
| <input type="checkbox"/> | <input type="checkbox"/> | 8. Establecer la política y el proceso para el manejo de los aportes y de las diferentes perspectivas de usuarios y grupos de interés. (ej. asegurar que las diversas perspectivas se tienen en cuenta en la toma de decisiones, proporcionar justificación transparente para las opiniones expuestas,, proporcionar un proceso de apelación para los grupos de interés, publicar comentarios de las consultas y las respuestas del panel de la guía).                                                      | 5-7,13,28,31,47 |

## Lista de Comprobación de elaboración de GPC

|                                                              |                          |                                                                                                                                                                                                                                                                                                                                                      |                                                          |
|--------------------------------------------------------------|--------------------------|------------------------------------------------------------------------------------------------------------------------------------------------------------------------------------------------------------------------------------------------------------------------------------------------------------------------------------------------------|----------------------------------------------------------|
| <input type="checkbox"/>                                     | <input type="checkbox"/> | 9. Documentar la inscripción y selección de usuarios y grupos de interés para el panel de la guía y la implicación y proceso de consulta con todos los demás usuarios y grupos de interés para garantizar métodos explícitos y transparentes.                                                                                                        | 1,5,13,15,20,26,28,31                                    |
| <b>7. Consideraciones sobre Conflicto de Intereses (COI)</b> |                          |                                                                                                                                                                                                                                                                                                                                                      |                                                          |
| <input type="checkbox"/>                                     | <input type="checkbox"/> | 1. Establecer una política de declaración de intereses de los participantes al momento de la admisión al proyecto, incluyendo a posibles miembros del panel de la guía antes de su participación (ej. qué intereses deben ser declarados: económicos, intelectuales, académicos/clínicos, intereses en competencia de las sociedades profesionales ) | 4-7,9,11,13-<br>15,17,19,20, 22-<br>25,36,38,42,44,48,49 |
| <input type="checkbox"/>                                     | <input type="checkbox"/> | 2. Establecer una política para determinar el conflicto de intereses y una aproximación, para recopilar y actualizar las declaraciones de los mismos (ej. cómo y qué nivel de intereses económicos deben declararse, la duración del período que debería cubrir la declaración, quien juzgará lo que constituye un conflicto).                       | 4-7,9,11,13-<br>15,17,19,20, 22-<br>25,36,42,44,48,49    |
| <input type="checkbox"/>                                     | <input type="checkbox"/> | 3. Proporcionar instrucciones claras y capacitación a los potenciales miembros del grupo de la guía sobre cómo realizar la declaración del conflicto de intereses, incluyendo una lista de los miembros que deben declararlos y de los tipos de intereses que deben declararse incluyendo ejemplos.                                                  | 4-7,9,13-<br>15,17,19,23,25,<br>36,44,48,49              |

## Lista de Comprobación de elaboración de GPC

|                          |                          |                                                                                                                                                                                                                                                                                                                                                                                                                   |                                                  |
|--------------------------|--------------------------|-------------------------------------------------------------------------------------------------------------------------------------------------------------------------------------------------------------------------------------------------------------------------------------------------------------------------------------------------------------------------------------------------------------------|--------------------------------------------------|
| <input type="checkbox"/> | <input type="checkbox"/> | 4. Establecer una política de manejo del conflicto de intereses (ej. Las personas con conflicto no son excluidos categóricamente del desarrollo de la guía, pero no participan en la votación sobre las recomendaciones específicas relacionadas con el área de conflicto, la coordinación no debe tener ningún conflicto de intereses, los resúmenes de evidencia son elaborados por metodólogos sin conflicto). | 4-7,9,11,13-15,17,19,20, 22-25,36,42,44,48,49    |
| <input type="checkbox"/> | <input type="checkbox"/> | 5. Establecer una política para manejar el conflicto de intereses con respecto al financiamiento de las actividades de elaboración de la GPC (ej. abogar por la financiación pública, sin patrocinio comercial, patrocinio comercial de entidades no relacionadas con el tema de la guía, apoyo comercial para actividades indirectas como la traducción, no depender de una única fuente de patrocinio).         | 7,20,25,26,29,48                                 |
| <input type="checkbox"/> | <input type="checkbox"/> | 6. Declarar y publicar la fuente de financiación y describir el papel de los patrocinadores y el apoyo prestado para la elaboración de GPC.                                                                                                                                                                                                                                                                       | 3,4,7,9,20,22,23,25,26, 29, 34,38,50             |
| <input type="checkbox"/> | <input type="checkbox"/> | 7. Declarar, publicar y describir explícitamente los conflictos de intereses de los miembros del grupo de la guía, sobre todo cuando los conflictos tienen que ver con recomendaciones específicas.                                                                                                                                                                                                               | 3-7,9,11,14,15,19,20,22, 23,25,26,34,36,42,49,50 |



## Lista de Comprobación de elaboración de GPC

| 8. Generación de preguntas (formato PICO) |                          |                                                                                                                                                                                                                                                                                                                                                                                            |                                                                  |
|-------------------------------------------|--------------------------|--------------------------------------------------------------------------------------------------------------------------------------------------------------------------------------------------------------------------------------------------------------------------------------------------------------------------------------------------------------------------------------------|------------------------------------------------------------------|
| <input type="checkbox"/>                  | <input type="checkbox"/> | 1. Establecer métodos para la generación, priorización y selección de las preguntas de la guía y para la clasificación de la importancia de los desenlaces.                                                                                                                                                                                                                                | 3-7,9,11-<br>15,18,19,22,23,<br>29,33,38,42,44,45,51             |
| <input type="checkbox"/>                  | <input type="checkbox"/> | 2. Generar y documentar las preguntas clave (ej. clínicas, de políticas de salud, de coste-efectividad) a las que se debe dar respuesta en la guía utilizando un formato estándar (ej. PICO) y determinar los criterios de priorización de las preguntas generadas, si no es factible responder a todas las preguntas (ej. encuestar a miembros del panel de la guía, a grupos de interés) | 3-7,9-<br>15,18,19,22,23,26,<br>29,33,38,42,44,45,51             |
| <input type="checkbox"/>                  | <input type="checkbox"/> | 3. Describir explícitamente la población a la que se pretende aplicar la guía. Tener en cuenta características específicas de la población, como la prevalencia de múltiples comorbilidades en la misma, contexto geográfico y cuestiones de equidad (ej. razones plausibles para anticipar efectos relativos diferenciales entre las poblaciones vulnerables y favorecidos).              | 4-<br>9,11,12,14,15,18,19,22,<br>23,26,30,34,38,40,42,5<br>2, 53 |
| <input type="checkbox"/>                  | <input type="checkbox"/> | 4. Determinar si es necesaria o no la aprobación reglamentaria para las intervenciones consideradas (ej. para las guías internacionales esto puede no ser relevante, ya que la aprobación reglamentaria puede no estar presente en todos los países objetivo).                                                                                                                             | 4,5,7,8,14,20,23,30,31                                           |

## Lista de Comprobación de elaboración de GPC

|                          |                          |                                                                                                                                                                                                                                                                                                                                                                                              |                                         |
|--------------------------|--------------------------|----------------------------------------------------------------------------------------------------------------------------------------------------------------------------------------------------------------------------------------------------------------------------------------------------------------------------------------------------------------------------------------------|-----------------------------------------|
| <input type="checkbox"/> | <input type="checkbox"/> | 5. Describir explícitamente las intervenciones y los comparadores considerados en la guía y desarrollar una estrategia analítica o un marco conceptual que muestre las relaciones entre las intervenciones y los desenlaces. Determinar si se deben incluir o no comparaciones múltiples (de tratamiento)                                                                                    | 4-9,11-15,18-20,22,23,33,34,42,45,54    |
| <input type="checkbox"/> | <input type="checkbox"/> | 6. Identificar los desenlaces importantes (ej. desenlaces a lo largo del algoritmo clínico, morbilidad, calidad de vida, mortalidad), incluyendo tanto los efectos deseables (ej. beneficios, menor carga, ahorro) como los indeseables (ej. daño, carga, costes y disminución de la autonomía del paciente) . No ignorar los desenlaces importantes para los cuáles pueda faltar evidencia. | 4-9,11-15,18-20,22,23,26,33,38,42,45,51 |
| <input type="checkbox"/> | <input type="checkbox"/> | 7. Determinar el contexto (ej. países, hospitales) o incluirlo en las consideraciones acerca de la población (por ejemplo, población atendida en los hospitales de atención terciaria).                                                                                                                                                                                                      | 4-7,18,19,23,33,44,51                   |
| <input type="checkbox"/> | <input type="checkbox"/> | 8. Preferir desenlaces importantes para pacientes por sobre los desenlaces subrogados o indirectos. Considerar qué tan apropiados son los desenlaces subrogados a lo largo de la vía causal cuando falten datos sobre desenlaces importantes para los pacientes.                                                                                                                             | 4-6,14,18,19,23,33,38,42,45,51          |
| <input type="checkbox"/> | <input type="checkbox"/> | 9. Clasificar la importancia relativa de los desenlaces, teniendo en cuenta los valores y preferencias de la población objetivo.                                                                                                                                                                                                                                                             | 4,5,7,11-15,19,23,33,42,51              |

## Lista de Comprobación de elaboración de GPC

|                                                   |                          |                                                                                                                                                                                                                                                                                                              |                                               |
|---------------------------------------------------|--------------------------|--------------------------------------------------------------------------------------------------------------------------------------------------------------------------------------------------------------------------------------------------------------------------------------------------------------|-----------------------------------------------|
| <input type="checkbox"/>                          | <input type="checkbox"/> | 10. Escoger o desarrollar un proceso para determinar a priori la magnitud del efecto, que será considerada importante por la población objetivo para los desenlaces individuales..                                                                                                                           | 33,42                                         |
| <input type="checkbox"/>                          | <input type="checkbox"/> | 11. Involucrar a todos los miembros del grupo de la guía y consultar a usuarios y grupos de interés para garantizar una amplia representación de la población objetivo en la generación y selección de las preguntas y en la calificación de los desenlaces importantes.                                     | 1,4,5,7,14,19,23,31,51                        |
| <input type="checkbox"/>                          | <input type="checkbox"/> | 12. Documentar los métodos de generación, priorización y selección de preguntas, y de la clasificación de los desenlaces, y de de la consulta a grupos de interés y usuarios para asegurar que sean explícitos y transparentes.                                                                              | 4,5,7,13,33,44                                |
| <input type="checkbox"/>                          | <input type="checkbox"/> | 13. Asegurarse de que el protocolo de la guía esboza la población objetivo, la condición objetivo, los desenlaces y las preguntas clave consideradas para ayudar a dirigir la revisión de la evidencia.                                                                                                      | 5,11,13,15,22,26,33,34,42,44                  |
| <b>9. Consideración de valores y preferencias</b> |                          |                                                                                                                                                                                                                                                                                                              |                                               |
| <input type="checkbox"/>                          | <input type="checkbox"/> | 1. Decidir si los valores y preferencias de usuarios y grupos de interés (ej. pacientes y público objetivo), para informar las decisiones y deliberaciones durante la elaboración de la GPC, serán obtenidos directa o indirectamente (ej. revisión de la literatura publicada vs. consulta a los usuarios). | 1,4,6,7,9,11,13,15,19,20,22,23,26,36,42,46,47 |

## Lista de Comprobación de elaboración de GPC

|                          |                          |                                                                                                                                                                                                                                                                 |                       |
|--------------------------|--------------------------|-----------------------------------------------------------------------------------------------------------------------------------------------------------------------------------------------------------------------------------------------------------------|-----------------------|
| <input type="checkbox"/> | <input type="checkbox"/> | 2. Establecer métodos para consultar a usuarios y grupos de interés para obtener información sobre los valores y preferencias (ej. participación de usuarios en el panel de la guía, encuestas o grupos focales con una representación más amplia de usuarios). | 6,15,23,36,46,47      |
| <input type="checkbox"/> | <input type="checkbox"/> | 3. Determinar si se utilizará un enfoque estructurado para evaluar la confianza (es decir, la calidad de la evidencia) en los valores y preferencias obtenidos                                                                                                  | E, 47                 |
| <input type="checkbox"/> | <input type="checkbox"/> | 4. Determinar si se utilizará el modelamiento (modelling) para integrar los valores y preferencias y cómo se llevará a cabo dicho modelamiento.                                                                                                                 | E, 45,47              |
| <input type="checkbox"/> | <input type="checkbox"/> | 5. Determinar qué perspectiva(s) se considerará(n) para la obtención de información sobre los valores y preferencias (ej. pacientes, público, sociedad, clínicos) ..                                                                                            | 4,19,36,46,47         |
| <input type="checkbox"/> | <input type="checkbox"/> | 6. Considerar y documentar los enfoques para lidiar con valores y preferencias en conflicto (ej. los paciente vs. Cuidador/a, paciente vs. público).                                                                                                            | 15,19,42,46,47        |
| <input type="checkbox"/> | <input type="checkbox"/> | 7. Documentar los métodos de obtención de información sobre los valores y preferencias para asegurar que sean explícitos y transparentes.                                                                                                                       | 1,6,11,15,26,42,46,47 |
| <input type="checkbox"/> | <input type="checkbox"/> | 8. Documentar posibles consideraciones éticas, si las recomendaciones deben prestar especial atención a ciertos grupos de pacientes o condiciones (ej. de edad avanzada, enfermedades                                                                           | 48                    |

## Lista de Comprobación de elaboración de GPC

|                                                                             |                          |                                                                                                                                                                                                                                                                                                                                                                                                                                                                                                                               |                                         |
|-----------------------------------------------------------------------------|--------------------------|-------------------------------------------------------------------------------------------------------------------------------------------------------------------------------------------------------------------------------------------------------------------------------------------------------------------------------------------------------------------------------------------------------------------------------------------------------------------------------------------------------------------------------|-----------------------------------------|
|                                                                             |                          | raras, los afectados por las desigualdades en salud).                                                                                                                                                                                                                                                                                                                                                                                                                                                                         |                                         |
| <input type="checkbox"/>                                                    | <input type="checkbox"/> | 9. Decidir la forma de tener en cuenta los valores éticos o morales en la formulación de recomendaciones (ej. teniendo en cuenta las convicciones religiosas, sociales o culturales).                                                                                                                                                                                                                                                                                                                                         | 57                                      |
| <b>10. Decisión sobre la evidencia a incluir y búsqueda de la evidencia</b> |                          |                                                                                                                                                                                                                                                                                                                                                                                                                                                                                                                               |                                         |
| <input type="checkbox"/>                                                    | <input type="checkbox"/> | 1. Seguir los métodos de revisión sistemática (ya sean revisiones sistemáticas completas o revisiones sistemáticas rápidas dependiendo del tema y de la estrategia de la organización o exponer las razones por las que esto no se realiza.                                                                                                                                                                                                                                                                                   | 3-15,18-<br>24,26,38,42,45, 55,56       |
| <input type="checkbox"/>                                                    | <input type="checkbox"/> | 2. Desarrollar un protocolo para localizar, seleccionar y sintetizar la evidencia (ej. llevar a cabo una búsqueda de revisiones sistemáticas existentes, nueva revisión sistemática y búsqueda en la literatura gris) y determinar el tipo de evidencia a incluir (ej. bases de datos en que se buscará/de búsqueda, tipos de estudios, los criterios de inclusión y exclusión, búsqueda de estudios específicos sobre efectos adversos o extracción de la información sobre efectos adversos de los estudios de beneficios). | 3-15,18-<br>24,26,33,34,38,<br>42,45,55 |
| <input type="checkbox"/>                                                    | <input type="checkbox"/> | 3. Decidir quién va a desarrollar las estrategias de búsqueda y quién la llevará a cabo y seleccionará la evidencia (ej. el grupo de trabajo del GEG, subcontratación de una agencia externa, establecimiento de una relación entre el GEG y la agencia externa para colaborar en                                                                                                                                                                                                                                             | 2,4-11,13,15,23,42,55                   |

## Lista de Comprobación de elaboración de GPC

|                          |                          |                                                                                                                                                                                                                                                                                       |                                     |
|--------------------------|--------------------------|---------------------------------------------------------------------------------------------------------------------------------------------------------------------------------------------------------------------------------------------------------------------------------------|-------------------------------------|
|                          |                          | el desarrollo de la guía).                                                                                                                                                                                                                                                            |                                     |
| <input type="checkbox"/> | <input type="checkbox"/> | 4. Evaluar críticamente las revisiones sistemáticas seleccionadas para incluir mediante el uso de una herramienta validada (ej. AMSTAR), para asegurar que sean de calidad suficiente y apropiada para ser utilizadas en la guía.                                                     | 4-7,9-12,14,15,19,23,38,42,45,55,56 |
| <input type="checkbox"/> | <input type="checkbox"/> | 5. Si una revisión sistemática existente se actualiza o necesita actualizarse, determinar cómo se incluirá la nueva evidencia y cómo se contactará a las personas que realizaron dicha revisión y que posiblemente participen en la actualización.                                    | 3,7,19,56                           |
| <input type="checkbox"/> | <input type="checkbox"/> | 6. Si se requiere una nueva revisión sistemática, llevar a cabo una evaluación para determinar si se dispone de recursos suficientes (ej. tiempo y fondos) para llevar a cabo una revisión sistemática completa.                                                                      | 7,14,19,55                          |
| <input type="checkbox"/> | <input type="checkbox"/> | 7. Si los recursos son limitados, considerar la aplicación de una metodología de evaluación rápida y describir explícitamente la metodología, mencionando las limitaciones importantes, incertidumbres, y la necesidad y la urgencia de realizar de una revisión sistemática completa | 7,8,19,55                           |
| <input type="checkbox"/> | <input type="checkbox"/> | 8. Establecer métodos para identificar evidencia adicional y datos no publicados (ej. sugerencias de las personas del panel de la guía, consultas a grupos de interés).                                                                                                               | 5,8,11,13,18,33,55                  |

## Lista de Comprobación de elaboración de GPC

|                                                                              |                          |                                                                                                                                                                                                                                                                                                                                                                                                                                                                 |                                         |
|------------------------------------------------------------------------------|--------------------------|-----------------------------------------------------------------------------------------------------------------------------------------------------------------------------------------------------------------------------------------------------------------------------------------------------------------------------------------------------------------------------------------------------------------------------------------------------------------|-----------------------------------------|
| <input type="checkbox"/>                                                     | <input type="checkbox"/> | 9. Establecer una política para el manejo de las contribuciones de las personas expertas (es decir, la opinión de expertos no es evidencia en si misma y no debería utilizarse como evidencia, en su lugar se deberán describir, identificar y, si es posible, evaluar de manera sistemática y transparente aquellas experiencias u observaciones que apoyen la opinión de las personas expertas, por ejemplo dentro del marco conceptual).                     | 8,10,11,23,54                           |
| <input type="checkbox"/>                                                     | <input type="checkbox"/> | 10. Documentar y publicar la búsqueda y selección de la evidencia, juzgando la elegibilidad, tipo de evidencia incluida, y las estrategias de búsqueda utilizadas para garantizar que los métodos son explícitos y transparentes.                                                                                                                                                                                                                               | 3-5,8,11,13,14,18-20,22, 26,34,56       |
| <b>11. Síntesis de la evidencia y consideración de información adicional</b> |                          |                                                                                                                                                                                                                                                                                                                                                                                                                                                                 |                                         |
| <input type="checkbox"/>                                                     | <input type="checkbox"/> | 1. Resumir la evidencia mediante un resumen conciso (ej. tabla de evidencia, perfil de evidencia o tablas de resumen de los hallazgos de la mejor evidencia disponible para cada uno de los desenlaces importantes, incluyendo pruebas de exactitud diagnóstica, beneficios previstos, daños, recursos (costes), la calificación de la calidad de evidencia y un resumen de los resultados / estimaciones del efecto relativos y absolutos para cada desenlace. | 4-8,10-15,18-20,23,26,34,38,42,45,55,56 |
| <input type="checkbox"/>                                                     | <input type="checkbox"/> | 2. Proporcionar un resumen de la información adicional necesaria para fundamentar las recomendaciones (ej. resumen narrativo cualitativo, tabla de evidencia), incluyendo valores                                                                                                                                                                                                                                                                               | 3-7,10,11,13-15,19,22,23,               |

## Lista de Comprobación de elaboración de GPC

|                          |                          |                                                                                                                                                                                                                                                                                                                                                                                          |                                                 |
|--------------------------|--------------------------|------------------------------------------------------------------------------------------------------------------------------------------------------------------------------------------------------------------------------------------------------------------------------------------------------------------------------------------------------------------------------------------|-------------------------------------------------|
|                          |                          | y preferencias, factores que podrían modificar los efectos esperados, necesidad (prevalencia, riesgo basal, o estado), efectos sobre equidad, factibilidad y disponibilidad de recursos.                                                                                                                                                                                                 | 26,30,42,44-46,53,55,57-59                      |
| <input type="checkbox"/> | <input type="checkbox"/> | 3. Establecer métodos para obtener información sobre el uso de recursos y costes (ej. búsqueda de evaluaciones económicas existentes, desarrollo de un modelo económico, realización de un análisis de coste-efectividad).                                                                                                                                                               | 4,5,7,11,13-15,18-20,22,23,26,42,45,57,59       |
| <input type="checkbox"/> | <input type="checkbox"/> | 4. Identificar los costes, el uso de recursos, y en caso de ser relevante, la relación coste-efectividad y describir la naturaleza de los costes (paciente, comunidad, sociedad) (ej. consideraciones de accesibilidad, estimación del uso de los recursos y los costes de adquisición ponderados directamente frente a la evidencia de los beneficios y los daños de una intervención). | 4,5,7,11,13-15,18-20,22,23,26,42,45,57,59       |
| <input type="checkbox"/> | <input type="checkbox"/> | 5. Para asegurar transparencia, realizar una documentación de los métodos a utilizar en los casos en que se incorporará la información adicional con la síntesis de evidencia (ej. consenso formal sobre los valores del paciente, consenso sobre asuntos de equidad, análisis económico formal, consideración de los datos de uso de recursos desglosados de manera cualitativa).       | 4,5,7,10,11,13-15,18-20,23,30,34,42,45,46,55,59 |



## Lista de Comprobación de elaboración de GPC

|                                                                                    |                          |                                                                                                                                                                                                                                                                                                                                                         |                         |
|------------------------------------------------------------------------------------|--------------------------|---------------------------------------------------------------------------------------------------------------------------------------------------------------------------------------------------------------------------------------------------------------------------------------------------------------------------------------------------------|-------------------------|
| <input type="checkbox"/>                                                           | <input type="checkbox"/> | 6. Proporcionar capacitación sobre el uso de las tablas de evidencia y espacios de discusión para asegurar que todos los miembros del panel de la guía están familiarizados con las tablas y las utilizan de la manera adecuada.                                                                                                                        | 2,15,27                 |
| <input type="checkbox"/>                                                           | <input type="checkbox"/> | 7. Además del resumen de la evidencia, poner a disposición del panel de la guía las revisiones sistemáticas completas y los estudios originales y otras fuentes de evidencia para fundamentar las deliberaciones (ej. crear un sitio Web de colaboración y/o poner esta información a disposición en reuniones y a través de comunicación electrónica). | 15,55                   |
| <b>12. Juicio de la calidad, fuerza o certidumbre del conjunto de la evidencia</b> |                          |                                                                                                                                                                                                                                                                                                                                                         |                         |
| <input type="checkbox"/>                                                           | <input type="checkbox"/> | 1. Seleccionar un marco conceptual que defina los criterios a considerar en la calificación de la calidad de la evidencia (ej. GRADE, USPSTF). Evitar modificar las herramientas de clasificación.                                                                                                                                                      | 4-15,18-24,42,45,56,60  |
| <input type="checkbox"/>                                                           | <input type="checkbox"/> | 2. Designar a la persona encargada de evaluar la calidad de la evidencia (ej. metodólogos sin conflicto que participan en el grupo de trabajo).                                                                                                                                                                                                         | 4,6,10,14,15,61         |
| <input type="checkbox"/>                                                           | <input type="checkbox"/> | 3. Evaluar la calidad de la evidencia de cada desenlace importante.                                                                                                                                                                                                                                                                                     | 4,5,7,11-15,42,45,56,60 |
| <input type="checkbox"/>                                                           | <input type="checkbox"/> | 4. Evaluar la calidad global de la evidencia (ej. la menor calidad de la evidencia cuando los desenlaces han sido calificados como los más importantes o críticos, o la mayor calidad de                                                                                                                                                                | 4,5,7-9,11-15,18-       |

## Lista de Comprobación de elaboración de GPC

|                          |                          |                                                                                                                                             |                                        |
|--------------------------|--------------------------|---------------------------------------------------------------------------------------------------------------------------------------------|----------------------------------------|
|                          |                          | la evidencia cuando todos los resultados apuntan en la misma dirección).                                                                    | 20,42,45,56,60                         |
| <input type="checkbox"/> | <input type="checkbox"/> | 5. Describir la calidad de la evidencia evaluada para cada desenlace y para el conjunto de la evidencia.                                    | 4,7,8,12,14,15,19,20,22<br>,45,50,61   |
| <input type="checkbox"/> | <input type="checkbox"/> | 6. Documentar los juicios realizados en la evaluación de la calidad de la evidencia para asegurar que éstos son transparentes y explícitos. | 4,5,7,8,11,13-15,18-<br>20,22,42,56,60 |

## Lista de Comprobación de elaboración de GPC

| 13. Desarrollo de las recomendaciones y determinación de su fuerza |                          |                                                                                                                                                                                                                                                                                                                                                                                                                                                                                                 |                                                                  |
|--------------------------------------------------------------------|--------------------------|-------------------------------------------------------------------------------------------------------------------------------------------------------------------------------------------------------------------------------------------------------------------------------------------------------------------------------------------------------------------------------------------------------------------------------------------------------------------------------------------------|------------------------------------------------------------------|
| <input type="checkbox"/>                                           | <input type="checkbox"/> | 1. Aplicar un marco conceptual definiendo los factores a tener en cuenta para llegar a una recomendación.                                                                                                                                                                                                                                                                                                                                                                                       | 3,5-15,18-<br>20,23,26,34,38,<br>42,45,60,62                     |
| <input type="checkbox"/>                                           | <input type="checkbox"/> | 2. Planificar y compartir los detalles logísticos de las reuniones de consenso en los que se formularán las recomendaciones con los participantes, incluyendo la distribución de los documentos necesarios para la reunión (ej. resúmenes de evidencia, tablas de la evidencia a la recomendación), estableciendo una agenda para la reunión y seleccionando el método de consenso que el grupo utilizará para ponerse de acuerdo en los juicios (ej. método Delphi, técnica de grupo nominal). | 7,9,10,18,42                                                     |
| <input type="checkbox"/>                                           | <input type="checkbox"/> | 3. Revisar los factores del marco conceptual que influyen en la recomendación, incluyendo el sentido y la fuerza (ej. el tipo de evidencia y la información relevante para el análisis, centrándose en el balance entre las consecuencias deseables e indeseables informadas por la calidad de la evidencia, la magnitud de la diferencia entre beneficios y daños, la certidumbre sobre los valores y preferencias o sobre su variabilidad, el uso de recursos, la equidad y otros factores).  | 3-<br>8,11,12,14,15,18,19,22,<br>23,26,34,38,42,45,53,6<br>0, 62 |

## Lista de Comprobación de elaboración de GPC

|                          |                          |                                                                                                                                                                                                                                                                                                                                                                                                                                                                                                                                                                |                                                    |
|--------------------------|--------------------------|----------------------------------------------------------------------------------------------------------------------------------------------------------------------------------------------------------------------------------------------------------------------------------------------------------------------------------------------------------------------------------------------------------------------------------------------------------------------------------------------------------------------------------------------------------------|----------------------------------------------------|
| <input type="checkbox"/> | <input type="checkbox"/> | 4. Si procede, tomar medidas para formular recomendaciones en situaciones donde haya evidencia insuficiente o de muy baja calidad (ej. recomendación condicional acompañada de los juicios realizados de forma transparente, la no formulación de recomendaciones si el panel de la guía cree que hay un riesgo sustancial de que su decisión pueda ser errónea, recomendar que la intervención se utilice en el contexto de investigación, complementado con una directriz sobre la mejor opción de manejo hasta que se disponga de investigación adicional). | 4,5,7,11,13-15,19,45,62                            |
| <input type="checkbox"/> | <input type="checkbox"/> | 5. Tomar medidas para la formulación de recomendaciones de investigación y decidir dónde recogerlas (ej. en el anexo de la guía, sugiriendo las preguntas específicas de investigación, desenlaces importantes para pacientes específicos a medir y otros aspectos relevantes sobre los que se necesita investigar para reducir la incertidumbre acerca de los beneficios y/o inconvenientes indeseables de la intervención).                                                                                                                                  | 5-7,14,15,45,62,63                                 |
| <input type="checkbox"/> | <input type="checkbox"/> | 6. Formular las recomendaciones y resumir el fundamento lógico para cada recomendación (ej. de forma narrativa o en una tabla), incluyendo detalles sobre los juicios hechos por el grupo y la relación explícita entre la recomendación y la evidencia que apoya dicha recomendación.                                                                                                                                                                                                                                                                         | 4-7,11-<br>13,15,19,20,23,26,<br>34,38,45,50,61,62 |

## Lista de Comprobación de elaboración de GPC

|                                                                                                         |                          |                                                                                                                                                                                                                                                                                                                                                                                                                                                                                                                                       |                                          |
|---------------------------------------------------------------------------------------------------------|--------------------------|---------------------------------------------------------------------------------------------------------------------------------------------------------------------------------------------------------------------------------------------------------------------------------------------------------------------------------------------------------------------------------------------------------------------------------------------------------------------------------------------------------------------------------------|------------------------------------------|
| <input type="checkbox"/>                                                                                | <input type="checkbox"/> | 7. Seleccionar un método para calificar la fuerza de las recomendaciones formuladas para informar a usuarios de la guía sobre el grado de confianza del grupo de la guía para seguir o no esa recomendación.                                                                                                                                                                                                                                                                                                                          | 4,6-9,12-15,18-23,42,45, 60,62           |
| <input type="checkbox"/>                                                                                | <input type="checkbox"/> | 8. Seleccionar un método de consenso para que el grupo lo utilice a la hora de calificar la fuerza de las recomendaciones (ej. método Delphi, técnica de grupo nominal, votación).                                                                                                                                                                                                                                                                                                                                                    | 2,4,6,7,15,19,42                         |
| <input type="checkbox"/>                                                                                | <input type="checkbox"/> | 9. Proporcionar sugerencias acerca de si las recomendaciones son apropiadas para servir como medidas de rendimiento/criterios de calidad (ej. las opciones de manejo asociadas a recomendaciones fuertes basadas en evidencia de calidad alta o moderada, son particularmente buenas candidatas para ser criterios de calidad; si una recomendación es débil, el discutir con los pacientes los méritos relativos de manejos alternativos y la adecuada documentación de esta interacción puede llegar a ser un criterio de calidad). | 4,9,13,23,40,62                          |
| <input type="checkbox"/>                                                                                | <input type="checkbox"/> | 10. Documentar los juicios realizados en la formulación de las recomendaciones y en la definición de su fuerza ,para asegurar que éstos son transparentes y explícitos.                                                                                                                                                                                                                                                                                                                                                               | 3,4,6-8,11-13,18-20,22,23,26,34,42,50,62 |
| <b>14. Redacción de las Recomendaciones y Consideraciones de Implementación, Factibilidad y Equidad</b> |                          |                                                                                                                                                                                                                                                                                                                                                                                                                                                                                                                                       |                                          |
| <input type="checkbox"/>                                                                                | <input type="checkbox"/> | 1. Para garantizar la claridad y mantener la coherencia en toda la guía, decidir sobre la                                                                                                                                                                                                                                                                                                                                                                                                                                             | 4,5,7-9,13,14,18-                        |

## Lista de Comprobación de elaboración de GPC

|                          |                          |                                                                                                                                                                                                                                                                                                                                                                                                                                                               |                                                   |
|--------------------------|--------------------------|---------------------------------------------------------------------------------------------------------------------------------------------------------------------------------------------------------------------------------------------------------------------------------------------------------------------------------------------------------------------------------------------------------------------------------------------------------------|---------------------------------------------------|
|                          |                          | redacción estándar que se utilizará para formular las recomendaciones, evitando términos que pueden ser vagos e inespecíficos.                                                                                                                                                                                                                                                                                                                                | 20,22,23, 26,42,45,62                             |
| <input type="checkbox"/> | <input type="checkbox"/> | 2. Escribir las recomendaciones de una manera que sea accionable, y que incluyan la información suficiente para las y los destinatarios de la guía no tengan que consultar otros materiales para poder entender la recomendación.                                                                                                                                                                                                                             | 4,5,7-9,<br>14,19,20,22,23,26,<br>34,45,50,61     |
| <input type="checkbox"/> | <input type="checkbox"/> | 3. Proporcionar una directriz clara o una ayuda de interpretación para describir las implicancias de la fuerza de la recomendación a los médicos, los pacientes, los responsables políticos y cualquier otro grupo del público objetivo.                                                                                                                                                                                                                      | 4,8,9,13,14,18,19,34,45<br>,62                    |
| <input type="checkbox"/> | <input type="checkbox"/> | 4. Indicar en la formulación de la recomendación la población a la que ésta se dirige, la intervención que se recomienda y los enfoques alternativos de intervención.                                                                                                                                                                                                                                                                                         | 4,5,8,9,13,19,34,45,61,<br>62                     |
| <input type="checkbox"/> | <input type="checkbox"/> | 5. Incluir comentarios que describan el contexto, la factibilidad y aplicabilidad de la recomendación y resaltar consideraciones clave, como aspectos relacionados con la equidad y condiciones específicas que podrían aplicarse a la recomendación (ej. si las condiciones descritas se aplican a una subpoblación específica, tipos específicos de la intervención, para ciertos valores y preferencias, cuando ciertos recursos están disponibles, etc.). | 3-5, 8,<br>9,13,19,23,30,34,<br>42,45,47,53,58,62 |
| <input type="checkbox"/> | <input type="checkbox"/> | 6. Establecer la calidad de la evidencia y la fuerza de la recomendación cerca de la redacción                                                                                                                                                                                                                                                                                                                                                                | 6-9,13,18-                                        |

## Lista de Comprobación de elaboración de GPC

|                                              |                          |                                                                                                                                                                                                                                                                                                                                                 |                                            |
|----------------------------------------------|--------------------------|-------------------------------------------------------------------------------------------------------------------------------------------------------------------------------------------------------------------------------------------------------------------------------------------------------------------------------------------------|--------------------------------------------|
|                                              |                          | de la recomendación.                                                                                                                                                                                                                                                                                                                            | 20,23,34,45,50                             |
| <input type="checkbox"/>                     | <input type="checkbox"/> | 7. Establecer los métodos que el grupo debe utilizar para acordar la redacción final de la recomendación (ej. revisión y aprobación, consenso formal).                                                                                                                                                                                          | 4,7,9,20,42,62                             |
| <input type="checkbox"/>                     | <input type="checkbox"/> | 8. Presentar sobre las recomendaciones de una manera que sea comprensible y visible (ej. no integrar recomendaciones dentro de párrafos largos, agrupar las recomendaciones en una sección de resumen).                                                                                                                                         | 5,9,14,15,23,26,45,61                      |
| <b>15. Presentación y revisión por pares</b> |                          |                                                                                                                                                                                                                                                                                                                                                 |                                            |
| <input type="checkbox"/>                     | <input type="checkbox"/> | 1. Desarrollar o adoptar un formato estandarizado para presentar la guía, con una estructura, encabezados y contenido específicos.                                                                                                                                                                                                              | 5-7,9-11,14,15,17,19-21, 24,34,38,42,50,61 |
| <input type="checkbox"/>                     | <input type="checkbox"/> | 2. Decidir los formatos que se prepararán para los productos de la guía (ej. guía completa, guía completa con informe técnico/revisiones sistemáticas, guía breve para profesionales de la medicina o responsables de decisiones de políticas en salud, versión para pacientes), que corresponderán con el plan de difusión. (véase el Tema 16) | 3-12,14,15,19-21,23,24, 40,50,61           |
| <input type="checkbox"/>                     | <input type="checkbox"/> | 3. Designar a las personas encargadas de redactar los productos de la guía (ej. sub-comité del GEG) y decidir sobre la autoría (ej. autores individuales, la organización como autor, grupo                                                                                                                                                     | 3-5,7,8,11,13-15,19,42,61                  |

## Lista de Comprobación de elaboración de GPC

|                          |                          |                                                                                                                                                                                                                                                                                                                                                                                                                                                                                                                                       |                                                      |
|--------------------------|--------------------------|---------------------------------------------------------------------------------------------------------------------------------------------------------------------------------------------------------------------------------------------------------------------------------------------------------------------------------------------------------------------------------------------------------------------------------------------------------------------------------------------------------------------------------------|------------------------------------------------------|
|                          |                          | de trabajo como autor). (véase el Tema 1)                                                                                                                                                                                                                                                                                                                                                                                                                                                                                             |                                                      |
| <input type="checkbox"/> | <input type="checkbox"/> | 4. Todos los miembros del GEG llevarán a cabo una revisión del borrador final de la guía dejando un plazo de tiempo suficiente para notificar comentarios al respecto, así como para la edición y la realización de las modificaciones.                                                                                                                                                                                                                                                                                               | 5-8,13,42,61,63                                      |
| <input type="checkbox"/> | <input type="checkbox"/> | 5. Buscar la aprobación de todos los miembros del GEG para el documento final.                                                                                                                                                                                                                                                                                                                                                                                                                                                        | 1,5,7-9,11,12,20,23,42                               |
| <input type="checkbox"/> | <input type="checkbox"/> | 6. Iniciar la revisión organizativa (es decir, interna) por pares.                                                                                                                                                                                                                                                                                                                                                                                                                                                                    | 5-<br>13,15,19,24,40,42,61,63                        |
| <input type="checkbox"/> | <input type="checkbox"/> | 7. Decidir cuál va a ser el método de revisión externa por pares que se va a utilizar, para revisar el documento final en relación a la precisión, practicidad, claridad, organización, y utilidad de las recomendaciones, así como para asegurar contribuciones/ aportes de perspectivas más amplias e importantes que el grupo de la guía no abarcó (ej. revisión por pares por invitación, período de consulta pública con incorporación de comentarios y respuestas del GEG, envío a una revista que realiza revisión por pares). | 3<br>3,5-11,13-15,19-<br>24,26,27,<br>38,40,42,61,63 |
| <input type="checkbox"/> | <input type="checkbox"/> | 8. Documentar el proceso interno y externo de revisión por pares y, si procede, publicar los                                                                                                                                                                                                                                                                                                                                                                                                                                          | 5-10,13,20,22,24,34,40,                              |



## Lista de Comprobación de elaboración de GPC

|                                      |                          |                                                                                                                                                                                                                                                                                                                                                                                                                                                                                                      |                                             |
|--------------------------------------|--------------------------|------------------------------------------------------------------------------------------------------------------------------------------------------------------------------------------------------------------------------------------------------------------------------------------------------------------------------------------------------------------------------------------------------------------------------------------------------------------------------------------------------|---------------------------------------------|
|                                      |                          | comentarios de la consulta y las respuestas del GEG.                                                                                                                                                                                                                                                                                                                                                                                                                                                 | 61,63                                       |
| <b>16. Difusión e implementación</b> |                          |                                                                                                                                                                                                                                                                                                                                                                                                                                                                                                      |                                             |
| <input type="checkbox"/>             | <input type="checkbox"/> | 1. Preparar un plan de difusión activo con varias aproximaciones para mejorar la adopción de la guía (ej. publicar la guía en Internet, desarrollar relaciones formales con las personas responsables de los servicios de salud para la difusión e implementación de la guía y para apoyar la adopción de la misma, rueda de prensa, estrategia de medios sociales, difusión en reuniones de sociedades de profesionales, publicación de la guía en una revista a la que accede el público objetivo) | 3-5,7,9-12,14,15,18-21,23, 38,40,42,64,65   |
| <input type="checkbox"/>             | <input type="checkbox"/> | 2. Desarrollar o adaptar herramientas, soporte y productos derivados con el fin de proporcionar la ayuda necesaria para implementar las recomendaciones en la práctica diaria (ej. aplicaciones móviles, integración con los sistemas de apoyo para decisiones clínicas, adaptar la guía como recurso didáctico para público objetivo).                                                                                                                                                              | 4-8,11,12,15,19,20,23,24, 26,34,40,42,58,61 |
| <input type="checkbox"/>             | <input type="checkbox"/> | 3. Realizar las consideraciones necesarias para la adaptación de la guía y proporcionar instrucciones específicas para aquellos usuarios que estén interesados en adaptar las recomendaciones a otros contextos de una manera sistemática y transparente (ej. modificando una recomendación en base a los recursos locales y el riesgo basal,                                                                                                                                                        | 7,15,18,20,26,37,58                         |

## Lista de Comprobación de elaboración de GPC

|                                     |                          |                                                                                                                                                                                                                                                                                                       |                                                   |
|-------------------------------------|--------------------------|-------------------------------------------------------------------------------------------------------------------------------------------------------------------------------------------------------------------------------------------------------------------------------------------------------|---------------------------------------------------|
|                                     |                          | implicaciones que se alejan de los juicios realizados por el panel de la guía).                                                                                                                                                                                                                       |                                                   |
| <input type="checkbox"/>            | <input type="checkbox"/> | 4. Establecer normas y reglamentos para la traducción de la guía a otros idiomas (ej. facilitar la traducción de la guía por terceras organizaciones una vez obtenido la aprobación del parte del grupo de la guía, incluir personal responsable de la traducción en el grupo de trabajo de la guía). | 7,24,37                                           |
| <b>17. Evaluación y utilización</b> |                          |                                                                                                                                                                                                                                                                                                       |                                                   |
| <input type="checkbox"/>            | <input type="checkbox"/> | 1. Llevar a cabo una evaluación interna (es decir, autoevaluación) del proceso de elaboración de la GPC, incluyendo las reuniones del panel de la guía realizadas para formular las recomendaciones, solicitando su opinión y comentarios a las y los miembros del grupo de la guía.                  | E, 63                                             |
| <input type="checkbox"/>            | <input type="checkbox"/> | 2. Considerar realizar una prueba piloto de la guía con los destinatarios finales (ej. con personas del público objetivo y grupos de interés que participaron en el GEG).                                                                                                                             | 6,15,18,26,34,63                                  |
| <input type="checkbox"/>            | <input type="checkbox"/> | 3. Proporcionar criterios y herramientas para que los destinatarios finales puedan monitorizar y auditar la implementación y uso de las recomendaciones de la guía (ej. identificar los desenlaces que deberían cambiar con la implementación y sugerir métodos para la medición de los desenlaces).  | 3-<br>7,9,11,12,14,15,18,20,<br>23,26,34,37,40,63 |

## Lista de Comprobación de elaboración de GPC

|                          |                          |                                                                                                                                                                                                                                                                                                                      |                                            |
|--------------------------|--------------------------|----------------------------------------------------------------------------------------------------------------------------------------------------------------------------------------------------------------------------------------------------------------------------------------------------------------------|--------------------------------------------|
| <input type="checkbox"/> | <input type="checkbox"/> | 4. Proporcionar apoyo y herramientas para la evaluación prospectiva de la guía para determinar su efectividad tras la implementación (ej realizando evaluaciones aleatorias, siempre que sea posible, estudios tipo “antes y después” con cautela debido a la incertidumbre sobre los efectos de la implementación). | 4,5,7,11,15,18,20,63,64                    |
| <input type="checkbox"/> | <input type="checkbox"/> | 5. Considerar la posible participación del GEG en la evaluación prospectiva de la guía (ej. asociación con las organizaciones que implementan la guía para planificar estudios de evaluación).                                                                                                                       | 5,7,15,23,24,63,64                         |
| <input type="checkbox"/> | <input type="checkbox"/> | 6. Planificar la obtención de comentarios y evaluaciones de los destinatarios para identificar como mejorar la implementabilidad intrínseca de las recomendaciones en las versiones posteriores de la guía.                                                                                                          | 4-6,11,18,23,37,63                         |
| <b>18. Actualización</b> |                          |                                                                                                                                                                                                                                                                                                                      |                                            |
| <input type="checkbox"/> | <input type="checkbox"/> | 1. Establecer una política, un procedimiento y un calendario para el seguimiento y la revisión rutinaria de la necesidad de actualización de la guía (ej. actualización de la revisión sistemática cada 3 años para determinar si existe cualquier nueva evidencia disponible).                                      | 3-9,11,12,14,15,18-24,26,34,37,40,42,63,66 |
| <input type="checkbox"/> | <input type="checkbox"/> | 2. Designar a los responsables de monitorizar la literatura de forma rutinaria y de evaluar si existe nueva evidencia significativa disponible (ej. considerar la participación de expertos no                                                                                                                       | 3,5-9,14,15,19,23,37,42,63                 |

## Lista de Comprobación de elaboración de GPC

|                          |                          |                                                                                                                                                                                                                                                                                                                                                                        |                                |
|--------------------------|--------------------------|------------------------------------------------------------------------------------------------------------------------------------------------------------------------------------------------------------------------------------------------------------------------------------------------------------------------------------------------------------------------|--------------------------------|
|                          |                          | implicados anteriormente en el GEG para revisar periódicamente la guía).                                                                                                                                                                                                                                                                                               |                                |
| <input type="checkbox"/> | <input type="checkbox"/> | 3. Establecer las condiciones que determinarán cuándo se requiere una actualización parcial o completa de la guía (ej. si se deben actualizar solamente algunas recomendaciones, o si son muchas las recomendaciones que están desactualizadas, hecho que invalidaría la guía completa, ,o cuando se necesitan recomendaciones sobre nuevos tratamientos disponibles). | 3-7,9,11,15,19,21-23,40, 63,66 |
| <input type="checkbox"/> | <input type="checkbox"/> | 4. Establecer acuerdos necesarios para la pertenencia y la participación en el grupo de la guía una vez finalizada la elaboración de la misma (ej. carácter rotatorio cada 1-2 años, selección de un nuevo grupo en el momento de la actualización, la continuidad de la participación del líder del panel de la guía).                                                | 5,9,13,19,24,37,63             |
| <input type="checkbox"/> | <input type="checkbox"/> | 5. Planificar la financiación y la logística para las futuras actualizaciones de la guía (ej. asegurando la financiación en curso, estableciendo un comité de vigilancia para supervisar el proceso de actualización).                                                                                                                                                 | 15,63                          |
| <input type="checkbox"/> | <input type="checkbox"/> | 6. Documentar el plan y los métodos propuestos para la actualización de la guía con el fin de asegurarse de que éstos se lleven a cabo.                                                                                                                                                                                                                                | 3,15,26,34,66                  |

\* opinión de personas expertas.

## Lista de Comprobación de elaboración de GPC

### Bibliografía:

1. Fretheim A, Schunemann H, Oxman A. Improving the use of research evidence in guideline development: 3. Group composition and consultation process. *Health Research Policy and Systems*. 2006;4:15.
2. Kunz R, Fretheim A, Cluzeau F, Wilt TJ, Qaseem A, Lelgemann M, et al.. Guideline Group Composition and Group Processes: Article 3 in Integrating and Coordinating Efforts in COPD Guideline Development. An Official ATS/ERS Workshop Report. *Proceedings of the American Thoracic Society*. 2012;9:229-233.
3. The ADAPTE Collaboration. The ADAPTE Process: Resource Toolkit for Guideline Adaptation. Version 2.0. 2009; <http://www.g-i-n.net/document-store/working-groups-documents/adaptation/adapte-resource-toolkit-guideline-adaptation-2-0.pdf>. Accessed July 5, 2013.
4. World Health Organization. Estonian Handbook for Guidelines Development. 2011; [http://whqlibdoc.who.int/publications/2011/9789241502429\\_eng.pdf](http://whqlibdoc.who.int/publications/2011/9789241502429_eng.pdf). Accessed April 22, 2013.
5. National Institute for Health and Clinical Excellence. The guidelines manual. 2012; <http://publications.nice.org.uk/the-guidelines-manual-pmg6>. Accessed April 22, 2013.
6. Scottish Intercollegiate Guidelines Network. SIGN 50: A guideline developer's handbook. 2011; <http://www.sign.ac.uk/guidelines/fulltext/50/>. Accessed April 22, 2013.
7. World Health Organization. WHO Handbook for Guideline Development. 2012; [http://apps.who.int/iris/bitstream/10665/75146/1/9789241548441\\_eng.pdf](http://apps.who.int/iris/bitstream/10665/75146/1/9789241548441_eng.pdf). Accessed April 22, 2013.

## Lista de Comprobación de elaboración de GPC

8. American College of Cardiology Foundation and American Heart Association. Methodology Manual and Policies from the ACCF/AHA Task Force on Practice Guidelines. 2010; [http://my.americanheart.org/professional/StatementsGuidelines/PoliciesDevelopment/Development/Methodologies-and-Policies-from-the-ACCAHA-Task-Force-on-Practice-Guidelines\\_UCM\\_320470\\_Article.jsp](http://my.americanheart.org/professional/StatementsGuidelines/PoliciesDevelopment/Development/Methodologies-and-Policies-from-the-ACCAHA-Task-Force-on-Practice-Guidelines_UCM_320470_Article.jsp). Accessed April 22, 2013.
9. Rosenfeld RM, Shiffman RN, Robertson P. Clinical Practice Guideline Development Manual, Third Edition: A Quality-Driven Approach for Translating Evidence into Action. *Otolaryngology -- Head and Neck Surgery*. 2013;148(1 suppl):S1-S55.
10. Cancer Care Ontario. Program in Evidence-Based Care Handbook. 2012; <http://www.cancercare.on.ca/about/programs/pebc/pebc-products/>. Accessed April 22, 2013.
11. Centers for Disease Control and Prevention. *Guidelines and Recommendations: A CDC Primer*. Atlanta, Georgia: Office of the Associate Director for Science Centers for Disease Control and Prevention;2012.
12. Davino-Ramaya C, Krause LK, Robbins CW, Harris JS, Koster M, Chan W, Tom GI. et al. Transparency matters: Kaiser Permanente's National Guideline Program methodological processes. *The Permanente journal*. Winter 2012;16(1):55-62.
13. Canadian Task Force on Preventive Health Care. Canadian Task Force on Preventive Health Care Procedure Manual. 2011; <http://canadiantaskforce.ca/methods/methods-manual/>. Accessed April 22, 2013.
14. Carrasquilla-Gutiérrez G, Bossert T, Quintero-Espinosa J, Alviar KM, Guerrero-Carvajal R, Sanchez-Pedraza R, et al. Guía metodológica para la elaboración de guías de atención

## Lista de Comprobación de elaboración de GPC

- integral en el sistema general de seguridad social en salud colombiano. Bogotá (Colombia): Ministerio de la Protección Social; 2010. Disponible en:  
<http://www.minsalud.gov.co/salud/Documents/Gu%C3%ADa%20Metodol%C3%B3gica%20para%20la%20elaboraci%C3%B3n%20de%20gu%C3%ADas.pdf>
15. Ministerio de Sanidad y Consumo. Elaboración de guías de práctica clínica en el sistema nacional de salud: Manual metodológico. 2007;  
<http://www.guiasalud.es/emanuales/elaboracion/index-02.html>. Accessed April 22, 2013.
  16. Oxman A, Schunemann H, Fretheim A. Improving the use of research evidence in guideline development: 2. Priority setting. *Health Research Policy and Systems*. 2006;4(1):14.
  17. American College of Cardiology Foundation and American Heart Association. Manuscript Development Process. 2010;  
[http://my.americanheart.org/professional/StatementsGuidelines/PoliciesDevelopment/Policies-Development\\_UCM\\_316897\\_Article.jsp](http://my.americanheart.org/professional/StatementsGuidelines/PoliciesDevelopment/Policies-Development_UCM_316897_Article.jsp). Accessed April 22, 2013.
  18. New Zealand Guidelines Group. *Handbook for the preparation of explicit evidence-based clinical practice guidelines*. Wellington: New Zealand Guidelines Group;2001.
  19. Agency for Healthcare Research and Quality. U.S. Preventive Services Task Force Procedure Manual. 2008;  
<http://www.uspreventiveservicestaskforce.org/uspstf08/methods/procmanual.htm>. Accessed April 22, 2013.
  20. National Health and Medical Research Council. Procedures and requirements for meeting the 2011 NHMRC standard for clinical practice guidelines. 2011;

## Lista de Comprobación de elaboración de GPC

- <http://www.nhmrc.gov.au/guidelines/publications/cp133-and-cp133a>. Accessed April 22, 2013.
21. Ministerio de Salud. Norma técnica para la elaboración de guías de practica clinica. 2005; [http://bvs.minsa.gob.pe/local/MINSA/1176\\_DGSP196.pdf](http://bvs.minsa.gob.pe/local/MINSA/1176_DGSP196.pdf). Accessed April 22, 2013.
  22. Qaseem A, Forland F, Macbeth F, Ollenschlager G, Phillips S, van der Wees P. Guidelines International Network: Toward international standards for clinical practice guidelines. *Ann Intern Med*. 2012;156(7):525-531.
  23. Institute of Medicine Committee on Standards for Developing Trustworthy Clinical Practice Guidelines. Clinical Practice Guidelines We Can Trust. 2011; [http://www.nap.edu/openbook.php?record\\_id=13058](http://www.nap.edu/openbook.php?record_id=13058). Accessed April 22, 2013.
  24. European Society of Cardiology. Recommendations for Guidelines Production. 2010; <http://www.escardio.org/guidelines-surveys/esc-guidelines/about/Pages/rules-writing.aspx>. Accessed April 22, 2013.
  25. Boyd EA, Akl EA, Baumann M, Curtis JR, Field MJ, Jaeschke R, et al. Guideline Funding and Conflicts of Interest: Article 4 in Integrating and Coordinating Efforts in COPD Guideline Development. An Official ATS/ERS Workshop Report. *Proceedings of the American Thoracic Society*. 2012;9:234-242.
  26. Brouwers MC, Kho ME, Browman GP, Burgers JS, Cluzeau F, Feder G, et al. AGREE II: Advancing guideline development, reporting and evaluation in health care. *Canadian Medical Association Journal*. 2010;182:E839-E842.
  27. Schunemann H, Fretheim A, Oxman A. Improving the use of research evidence in guideline development: 1. Guidelines for guidelines. *Health Research Policy and Systems*. 2006;4:13.



## Lista de Comprobación de elaboración de GPC

28. National Institute for Health and Clinical Excellence. How NICE clinical guidelines are developed: An overview for stakeholders, the public and the NHS. 5th Edition. 2012; <http://publications.nice.org.uk/pmg6f>. Accessed April 22, 2013.
29. Jacobs AK, Kushner FG, Ettinger SM, Guyton RA, Anderson JL, Ohman EM, et al. ACCF/AHA clinical practice guideline methodology summit report: a report of the American College of Cardiology Foundation/American Heart Association Task Force on Practice Guidelines. *J Am Coll Cardiol*. 2013;61:213-265.
30. Oxman A, Schunemann H, Fretheim A. Improving the use of research evidence in guideline development: 12. Incorporating considerations of equity. *Health Research Policy and Systems*. 2006;4:24.
31. Cluzeau F, Wedzicha JA, Kelson M, Corn J, Kunz R, Walsh J, et al. Stakeholder Involvement: How to Do It Right: Article 9 in Integrating and Coordinating Efforts in COPD Guideline Development. An Official ATS/ERS Workshop Report. *Proceedings of the American Thoracic Society*. 2012;9:269-273.
32. Fretheim A, Schunemann H, Oxman A. Improving the use of research evidence in guideline development: 5. Group processes. *Health Research Policy and Systems*. 2006;4:17.
33. Wilt TJ, Guyatt G, Kunz R, Macnee W, Puhan MA, Viegi G, et al. Deciding What Type of Evidence and Outcomes to Include in Guidelines: Article 5 in Integrating and Coordinating Efforts in COPD Guideline Development. An Official ATS/ERS Workshop Report. *Proceedings of the American Thoracic Society*. 2012;9:243-250.

## Lista de Comprobación de elaboración de GPC

34. Shiffman RN, Shekelle P, Overhage JM, Slutsky J, Grimshaw J, Deshpande AM. Standardized reporting of clinical practice guidelines: a proposal from the Conference on Guideline Standardization. *Ann Intern Med.* 2003;139:493-498.
35. Atkins D, Perez-Padilla R, MacNee W, Buist AS, Cruz AA. Priority Setting in Guideline Development: Article 2 in Integrating and Coordinating Efforts in COPD Guideline Development. An Official ATS/ERS Workshop Report. *Proceedings of the American Thoracic Society.* 2012;9:225-228.
36. Eccles M, Grimshaw J, Shekelle P, Schunemann H, Woolf S. Developing clinical practice guidelines: target audiences, identifying topics for guidelines, guideline group composition and functioning and conflicts of interest. *Implementation Science.* 2012;7:60.
37. Burgers JS, Anzueto A, Black PN, Cruz AA, Fervers B, Graham ID, et al. Adaptation, Evaluation, and Updating of Guidelines: Article 14 in Integrating and Coordinating Efforts in COPD Guideline Development. An Official ATS/ERS Workshop Report. *Proceedings of the American Thoracic Society.* 2012;9:304-310.
38. Esandi ME, Luca MD, Chapman E, Schapochnik N, Bernztein R, Otheguy L. Guía para la adaptación de Guías de Práctica Clínica. 2008; <http://publicaciones.ops.org.ar/publicaciones/otras%20pub/GuiadeGuias.pdf>. Accessed April 22, 2013.
39. Schunemann HJ, Woodhead M, Anzueto A, Buist AS, Macnee W, Rabe KF, et al. A guide to guidelines for professional societies and other developers of recommendations: Introduction to integrating and coordinating efforts in COPD guideline development. An official ATS/ERS workshop report. *Proceedings of the American Thoracic Society.* 2012;9:215-218.

## Lista de Comprobación de elaboración de GPC

40. Shekelle P, Woolf S, Grimshaw J, Schunemann H, Eccles M. Developing clinical practice guidelines: reviewing, reporting, and publishing guidelines; updating guidelines; and the emerging issues of enhancing guideline implementability and accounting for comorbid conditions in guideline development. *Implementation Science*. 2012;7:62.
41. Yawn BP, Akl EA, Qaseem A, Black P, Campos-Outcalt D. Identifying Target Audiences: Who Are the Guidelines For?: Article 1 in Integrating and Coordinating Efforts in COPD Guideline Development. An Official ATS/ERS Workshop Report. *Proceedings of the American Thoracic Society*. 2012;9:219-224.
42. Guyatt GH, Norris SL, Schulman S, Hirsh J, Eckman MH, Akl EA, et al. Methodology for the development of antithrombotic therapy and prevention of thrombosis guidelines: Antithrombotic Therapy and Prevention of Thrombosis, 9th ed: American College of Chest Physicians Evidence-Based Clinical Practice Guidelines. *Chest*. 2012;141(2 Suppl):53S-70S.
43. National Institute for Health and Clinical Excellence. The guidelines manual: Appendix A – Agreements and advice for Guideline Development Group members. 2012; <http://publications.nice.org.uk/pmg6a>. Accessed April 22, 2013.
44. National Health and Medical Research Council. Guideline Development and Conflicts of Interest: Identifying and Managing Conflicts of Interest of Prospective Members and Members of NHMRC Committees and Working Groups Developing Guidelines. 2012; <http://www.nhmrc.gov.au/guidelines-and-publications/information-guideline-developers/guideline-development-and-conflicts>. Accessed April 22, 2013.

## Lista de Comprobación de elaboración de GPC

45. Woolf S, Schunemann H, Eccles M, Grimshaw J, Shekelle P. Developing clinical practice guidelines: types of evidence and outcomes; values and economics, synthesis, grading, and presentation and deriving recommendations. *Implementation Science*. 2012;7:61.
46. Kelson M, Akl EA, Bastian H, Cluzeau F, Curtis JR, Guyatt G, et al. Integrating Values and Consumer Involvement in Guidelines with the Patient at the Center: Article 8 in Integrating and Coordinating Efforts in COPD Guideline Development. An Official ATS/ERS Workshop Report. *Proceedings of the American Thoracic Society*. 2012;9:262-268.
47. Schunemann H, Fretheim A, Oxman A. Improving the use of research evidence in guideline development: 10. Integrating values and consumer involvement. *Health Research Policy and Systems*. 2006;4:22.
48. Boyd E, Bero L. Improving the use of research evidence in guideline development: 4. Managing conflicts of interests. *Health Research Policy and Systems*. 2006;4:16.
49. Cancer Care Ontario. Program in Evidence-Based Care Conflict of Interest Policy. 2011; <http://www.cancercare.on.ca/cms/one.aspx?objectId=7582&contextId=1377>. Accessed April 22, 2013.
50. Oxman A, Schunemann H, Fretheim A. Improving the use of research evidence in guideline development: 14. Reporting guidelines. *Health Research Policy and Systems*. 2006;4:26.
51. Schunemann H, Oxman A, Fretheim A. Improving the use of research evidence in guideline development: 6. Determining which outcomes are important. *Health Research Policy and Systems*. 2006;4:18.

## Lista de Comprobación de elaboración de GPC

52. Fabbri LM, Boyd C, Boschetto P, Rabe KF, Buist AS, Yawn B, et al. How to Integrate Multiple Comorbidities in Guideline Development: Article 10 in Integrating and Coordinating Efforts in COPD Guideline Development. An Official ATS/ERS Workshop Report. *Proceedings of the American Thoracic Society*. 2012;9:274-281.
53. National Institute for Health and Clinical Excellence. Positively Equal: A guide to addressing equality issues in developing clinical guidelines. 2012; <http://www.nice.org.uk/aboutnice/howwework/developingniceclinicalguidelines/PositivelyEqual.jsp>. Accessed July 5, 2013.
54. Oxman A, Schunemann H, Fretheim A. Improving the use of research evidence in guideline development: 7. Deciding what evidence to include. *Health Research Policy and Systems*. 2006;4:19.
55. Oxman A, Schunemann H, Fretheim A. Improving the use of research evidence in guideline development: 8. Synthesis and presentation of evidence. *Health Research Policy and Systems*. 2006;4:20.
56. Guyatt G, Akl EA, Oxman A, Wilson K, Puhan MA, Wilt T, et al. Synthesis, Grading, and Presentation of Evidence in Guidelines: Article 7 in Integrating and Coordinating Efforts in COPD Guideline Development. An Official ATS/ERS Workshop Report. *Proceedings of the American Thoracic Society*. 2012;9:256-261.
57. Edejer T. Improving the use of research evidence in guideline development: 11. Incorporating considerations of cost-effectiveness, affordability and resource implications. *Health Research Policy and Systems*. 2006;4:23.

## Lista de Comprobación de elaboración de GPC

58. Schunemann H, Fretheim A, Oxman A. Improving the use of research evidence in guideline development: 13. Applicability, transferability and adaptation. *Health Research Policy and Systems*. 2006;4:25.
59. Hill SR, Olson LG, Falck-Ytter Y, Cruz AA, Atkins D, Baumann M, et al. Incorporating Considerations of Cost-Effectiveness, Affordability, and Resource Implications in Guideline Development: Article 6 in Integrating and Coordinating Efforts in COPD Guideline Development. An Official ATS/ERS Workshop Report. *Proceedings of the American Thoracic Society*. 2012;9:251-255.
60. Schunemann H, Fretheim A, Oxman A. Improving the use of research evidence in guideline development: 9. Grading evidence and recommendations. *Health Research Policy and Systems*. 2006;4:21.
61. Wilson KC, Irwin RS, File TM, Schünemann HJ, Guyatt GH, Rabe KF. Reporting and Publishing Guidelines: Article 12 in Integrating and Coordinating Efforts in COPD Guideline Development. An Official ATS/ERS Workshop Report. *Proceedings of the American Thoracic Society*. 2012;9:293-297.
62. Schünemann HJ, Oxman AD, Akl EA, Brozek JL, Montori VM, Heffner J, et al. Moving from Evidence to Developing Recommendations in Guidelines: Article 11 in Integrating and Coordinating Efforts in COPD Guideline Development. An Official ATS/ERS Workshop Report. *Proceedings of the American Thoracic Society*. 2012;9:282-292.
63. Oxman A, Schunemann H, Fretheim A. Improving the use of research evidence in guideline development: 16. Evaluation. *Health Research Policy and Systems*. 2006;4:28.

## Lista de Comprobación de elaboración de GPC

64. Fretheim A, Schunemann H, Oxman A. Improving the use of research evidence in guideline development: 15. Disseminating and implementing guidelines. *Health Research Policy and Systems*. 2006;4:27.
65. Grimshaw JM, Schünemann HJ, Burgers J, Cruz AA, Heffner J, Metersky M, et al. Disseminating and Implementing Guidelines: Article 13 in Integrating and Coordinating Efforts in COPD Guideline Development. An Official ATS/ERS Workshop Report. *Proceedings of the American Thoracic Society*. 2012;9:298-303.
66. Cancer Care Ontario. Program in Evidence-Based Care Document Assessment and Review Protocol. 2012; [http://www.cancercare.on.ca/about/programs/pebc/document\\_review/](http://www.cancercare.on.ca/about/programs/pebc/document_review/). Accessed April 22, 2013.

## Lista de Comprobación de elaboración de GPC – Glosario de Términos

### Anexo 2: Glosario de Términos

Este glosario incluye definiciones de términos y acrónimos que son nombrados en la lista de comprobación, con el objetivo de facilitar la interpretación de los ítems incluidos. Aquellos términos que se relacionan, se han agrupado en categorías que describen los distintos aspectos del desarrollo de una guía.

| Término                                                                                        | Definición                                                                                                                                                                                                                                                                                                                                                                                                                                                                                                                                                                           |
|------------------------------------------------------------------------------------------------|--------------------------------------------------------------------------------------------------------------------------------------------------------------------------------------------------------------------------------------------------------------------------------------------------------------------------------------------------------------------------------------------------------------------------------------------------------------------------------------------------------------------------------------------------------------------------------------|
| <i>Grupos, individuos y organizaciones involucradas en el proceso de desarrollo de la guía</i> |                                                                                                                                                                                                                                                                                                                                                                                                                                                                                                                                                                                      |
| Grupo elaborador de la GPC (GEG)                                                               | Grupo de profesionales de la salud y otros, grupos de interés, pacientes y cuidadores, investigadores y personal técnico que desarrolla una guía. El Grupo elaborador de la GPG (GEG) puede estar constituido por varios subgrupos o comités con tareas específicas como el comité supervisor, el panel de la guía, grupos de interés y representantes de usuarios, y el grupo de trabajo. Algunos miembros pueden pertenecer a más de un subgrupo o comité (ej. Una persona que es clínico e investigador como miembro del grupo de trabajo y del panel de la guía). <sup>1,2</sup> |
| Comité supervisor                                                                              | Grupo que supervisa el proceso de desarrollo de una guía, cuyas tareas incluyen el establecimiento de prioridades y la selección de guías potenciales a desarrollar más allá del tema propuesto, el reclutamiento y nombramiento de los miembros del panel de la guía y la aprobación de la GPC final para su publicación y difusión. Denominado también como comité ejecutivo o consejo asesor de la                                                                                                                                                                                |



## Lista de Comprobación de elaboración de GPC – Glosario de Términos

|                                     |                                                                                                                                                                                                                                                                                                                                                                                                                                                                                                                                                                                  |
|-------------------------------------|----------------------------------------------------------------------------------------------------------------------------------------------------------------------------------------------------------------------------------------------------------------------------------------------------------------------------------------------------------------------------------------------------------------------------------------------------------------------------------------------------------------------------------------------------------------------------------|
|                                     | guía. <sup>2</sup>                                                                                                                                                                                                                                                                                                                                                                                                                                                                                                                                                               |
| Panel de la guía                    | Decide acerca de los temas que se abordarán en la guía, define las preguntas, desarrolla y formula las recomendaciones en la guía usando resúmenes de evidencia preparados por el grupo de trabajo, y aprueba el documento final de la guía para su posterior aprobación por parte del comité supervisor. Las y los miembros del panel de la guía a menudo pueden llamarse ' <i>panelistas</i> '. <sup>2</sup>                                                                                                                                                                   |
| Director/a (del panel de la guía)   | Miembro líder del panel. Esta persona es neutral y tiene experiencia en la coordinación de grupos de profesionales de la salud, pacientes y cuidadores.<br><br>La persona a cargo de la dirección debe estar cualificada y tener experiencia en estrategias para facilitar el funcionamiento del grupo, asegurar que todos los miembros del panel tienen las mismas oportunidades para contribuir y expresar de manera libre sus opiniones sin sentirse intimidados. Este individuo no tiene que ser necesariamente experto en ningún área clínica en particular. <sup>3,4</sup> |
| Codirector/a (del panel de la guía) | Se debe designar cuando el panel de la guía es especialmente grande o las tareas asignadas son particularmente complejas. El o la codirector/a debe tener experiencia liderando grupos pero debe, además, dominar una disciplina (clínica o metodológica) diferente a la de la persona a cargo de la dirección. <sup>3,4</sup>                                                                                                                                                                                                                                                   |

## Lista de Comprobación de elaboración de GPC – Glosario de Términos

|                   |                                                                                                                                                                                                                                                                                                                                                                                                                                                                                                                                                                                                                                              |
|-------------------|----------------------------------------------------------------------------------------------------------------------------------------------------------------------------------------------------------------------------------------------------------------------------------------------------------------------------------------------------------------------------------------------------------------------------------------------------------------------------------------------------------------------------------------------------------------------------------------------------------------------------------------------|
| Grupo de trabajo  | Grupo de personas a quienes se les asigna la tarea de preparar y apoyar técnicamente el desarrollo de la guía, asistiendo al panel de la guía en la formulación de preguntas en formato PICO, conduciendo revisiones sistemáticas, evaluando la calidad de la evidencia, preparando los resúmenes de evidencia y otros documentos de apoyo para la discusión con el panel de la guía, escribiendo la guía y revisando los comentarios de los grupos de interés y la consulta pública. Este grupo trabaja de cerca con el panel de la guía para asegurar que se cumplen las tareas necesarias para alcanzar las metas y objetivos de la guía. |
| Secretaría        | Grupo de personas cuya tarea es apoyar al GEG en los preparativos para el desarrollo y escritura de la guía. Las personas a cargo de la secretaría proveen apoyo técnico y administrativo (ej. Agenda, reuniones y teleconferencias, distribución de documentos) <sup>2</sup>                                                                                                                                                                                                                                                                                                                                                                |
| Grupos de interés | Una persona, grupo u organización que tiene un interés en la organización y transferencia de servicios de salud y que se interesará en el contenido y en los resultados de una guía. Se incluye en este grupo a proveedores de servicios de salud, colegios y otras sociedades profesionales, expertos en una enfermedad o condición, instituciones investigadoras y elaboradores de políticas. <sup>1,2</sup>                                                                                                                                                                                                                               |
| Usuarios/as       | Las y los usuarios de salud incluyen: a) pacientes individuales, b) cuidadores, incluyendo familiares y amistades del pacientes, c) miembros del público general (potenciales pacientes y financiadores de servicios de salud a través del pago de impuestos o aseguradoras), d) organizaciones voluntarias y                                                                                                                                                                                                                                                                                                                                |

## Lista de Comprobación de elaboración de GPC – Glosario de Términos

|                            |                                                                                                                                                                                                                                                                                                                                                                                                                                                 |
|----------------------------|-------------------------------------------------------------------------------------------------------------------------------------------------------------------------------------------------------------------------------------------------------------------------------------------------------------------------------------------------------------------------------------------------------------------------------------------------|
|                            | <p>comunitarias que representan los intereses de los y las pacientes, cuidadores y del público, e) defensores de los intereses de pacientes, cuidadores y otros clientes.</p> <p>Ellos se describen colectivamente como <i>usuarios</i> (esto no implica asumir consumo de servicios de salud) y son diferentes de otros destinatarios de guías tales como profesionales de la salud, comisionados, y proveedores de servicios.<sup>5</sup></p> |
| Cuidador/a                 | Son aquellas personas que proveen apoyo a pacientes o cuidados de salud no remunerado (ej. familiares, amistades) y están en conocimiento de los problemas que son importantes para pacientes y cuidadores.                                                                                                                                                                                                                                     |
| Defensor/a                 | Aquellas personas que hablan en nombre de un paciente, o un grupo de pacientes, para ayudarles a dar a conocer sus necesidades. <sup>6</sup>                                                                                                                                                                                                                                                                                                    |
| Organización patrocinadora | Organización que financia la elaboración de una guía y respalda su publicación y difusión.                                                                                                                                                                                                                                                                                                                                                      |

## Lista de Comprobación de elaboración de GPC – Glosario de Términos

|                                           |                                                                                                                                                                                                                                                                                                                                                                                                                                                                                                                                                                                                                  |
|-------------------------------------------|------------------------------------------------------------------------------------------------------------------------------------------------------------------------------------------------------------------------------------------------------------------------------------------------------------------------------------------------------------------------------------------------------------------------------------------------------------------------------------------------------------------------------------------------------------------------------------------------------------------|
| Sociedades profesionales                  | Organizaciones sin fines/ ánimo de lucro cuyos miembros son profesionales de la salud que trabajan en un campo específico o especialidad y cuya labor se centra en un tema o área específica en servicios de salud (ej. Sociedad Española de Cardiología /Sociedad Latinoamericana y del Caribe de Oncología Médica). Las sociedades profesionales están a menudo involucradas en la elaboración de guías para sus miembros y a menudo adoptan políticas con respecto a cuestiones médicas y de promoción de la salud. Denominados también como organizaciones profesionales, sociedades médicas o asociaciones. |
| Terceros                                  | Organizaciones o grupos que desean adoptar o adaptar una guía en cuya elaboración no participaron directamente.. A menudo, se incluyen departamentos gubernamentales o ministerios de salud que no tienen suficientes recursos para desarrollar guías <i>de novo</i> , o cuyas poblaciones e instituciones prestadoras de servicios de salud son similares a aquellas cubiertas por una guía preexistente.                                                                                                                                                                                                       |
| <b>Guías y temas</b>                      |                                                                                                                                                                                                                                                                                                                                                                                                                                                                                                                                                                                                                  |
| Guía<br>Guía de Práctica Clínica<br>(GPC) | Documento que se centra en una enfermedad o condición e incluye recomendaciones para el manejo apropiado de pacientes con esta enfermedad o condición. La guía debe basarse en la mejor evidencia disponible y debe ayudar a los proveedores de servicios de salud complementando sus conocimientos y habilidades. Las guías pueden orientarse para su aplicación en contextos clínicos, de políticas de salud, sistemas de salud o salud pública, entre otros. <sup>2</sup>                                                                                                                                     |

## Lista de Comprobación de elaboración de GPC – Glosario de Términos

|                        |                                                                                                                                                                                                                                                                                                                                                                                                                                                                                                                                                                                                                                                                                                                                                                                                                  |
|------------------------|------------------------------------------------------------------------------------------------------------------------------------------------------------------------------------------------------------------------------------------------------------------------------------------------------------------------------------------------------------------------------------------------------------------------------------------------------------------------------------------------------------------------------------------------------------------------------------------------------------------------------------------------------------------------------------------------------------------------------------------------------------------------------------------------------------------|
| Público objetivo       | Grupo específico o gama de proveedores de salud a quienes se dirige la GPC, con el objeto de orientar su trabajo en el contexto de la atención sanitaria. El público objetivo tendrá una influencia en la amplitud y profundidad del contenido de la guía. <sup>7</sup> El <b>público principal</b> está compuesto por los usuarios finales a los que se dirige de la guía. Por ejemplo, si la guía está destinada a la atención primaria, el público objetivo lo compondrán los profesionales de la medicina y enfermería que ejercen en la atención primaria. El <b>público secundario</b> puede incluir cualquier otro grupo para el cual el contenido de la guía sea aplicable, tales como la dirección de instituciones de salud, la administración de hospitales y elaboradores de políticas. <sup>8</sup> |
| Tema de la GPC         | El Tema de la guía especifica la enfermedad, condición o área general que cubrirá la guía (ej. Enfermedad pulmonar obstructiva crónica). Los elaboradores de guías deben considerar la priorización de los temas con mayor potencial para mejorar los cuidados de salud y desenlaces en salud. <sup>9</sup>                                                                                                                                                                                                                                                                                                                                                                                                                                                                                                      |
| Temas dentro de la GPC | Los temas dentro de la guía definen el contenido que cubrirá la guía. Por ejemplo, si la guía tratará sobre el diagnóstico de una condición, su tratamiento, o ambos, o si se centrará en temas donde existe mayor incertidumbre o variabilidad en la práctica clínica. Los paneles de guías deben considerar y decidir sobre todos los posibles problemas que podrían abordarse en una guía que serán de importancia para la el publico objetivo. Definidos también como el alcance de una guía, estarán                                                                                                                                                                                                                                                                                                        |

## Lista de Comprobación de elaboración de GPC – Glosario de Términos

|                                                  |                                                                                                                                                                                                                                                                                                                                                                                                                                                                                                                                                                                                                                                                 |
|--------------------------------------------------|-----------------------------------------------------------------------------------------------------------------------------------------------------------------------------------------------------------------------------------------------------------------------------------------------------------------------------------------------------------------------------------------------------------------------------------------------------------------------------------------------------------------------------------------------------------------------------------------------------------------------------------------------------------------|
|                                                  | interrelacionados con las preguntas en formato PICO que se aborden en la GPC.                                                                                                                                                                                                                                                                                                                                                                                                                                                                                                                                                                                   |
| <b><i>Etapas para el desarrollo de guías</i></b> |                                                                                                                                                                                                                                                                                                                                                                                                                                                                                                                                                                                                                                                                 |
| Establecimiento de prioridades                   | El establecimiento de prioridades consiste en que los grupos de interés identifiquen, sopesen y jerarquicen las prioridades. De este modo, se garantiza que los recursos y la asistencia se dedican a esas áreas generales (ej. enfermedad pulmonar obstructiva crónica, diabetes, enfermedades cardiovasculares, cáncer, prevención), en las que las recomendaciones del cuidado de la salud proporcionarán el mayor beneficio a una población, una región o un país. La manera en que se abordan estas prioridades debe contribuir a futuros proyectos, al mismo tiempo que responde a las circunstancias potencialmente difíciles existentes <sup>10</sup> . |
| Revisión por pares                               | Consiste en someter trabajos académicos, trabajos de investigación o ideas al escrutinio de otros. La revisión por pares de una guía y unas recomendaciones, por parte de personas con intereses, conocimientos y experiencia similares a los de aquellas que la producen, pretende asegurar la precisión y validez de esta guía. Esta revisión puede ser interna, cuando la realizan colegas de la misma organización que no están involucrados directamente en el desarrollo de la guía, o externa, cuando la llevan a cabo personas totalmente independientes y ajenas al desarrollo de la misma. <sup>2,6</sup>                                             |
| Difusión                                         | Se trata del proceso activo de divulgar información, como una guía, a los usuarios a los que va dirigida, para asegurar su máxima exposición, captación e implementación. Se pueden utilizar                                                                                                                                                                                                                                                                                                                                                                                                                                                                    |

## Lista de Comprobación de elaboración de GPC – Glosario de Términos

|                        |                                                                                                                                                                                                                                                                                                                                                                                                                                                                                                                                                                                   |
|------------------------|-----------------------------------------------------------------------------------------------------------------------------------------------------------------------------------------------------------------------------------------------------------------------------------------------------------------------------------------------------------------------------------------------------------------------------------------------------------------------------------------------------------------------------------------------------------------------------------|
|                        | diversos métodos de difusión, como versiones impresas de la guía completa, versiones on-line, guías resumidas, aplicaciones para el móvil, incorporación de algunas recomendaciones en sistemas de apoyo de decisiones clínicas, versiones para el público general, material didáctico que describa las recomendaciones, organización de reuniones con los usuarios a los que va dirigida, etc. A excepción del documento guía principal, a los demás productos desarrollados se les denomina habitualmente <i>productos derivados</i> . <sup>11</sup>                            |
| Implementación         | Hace referencia a la adopción e incorporación de las recomendaciones de la guía por parte de las y los usuarios a los que va dirigida, en su práctica clínica. Un plan de implementación debe incluir la identificación de posibles obstáculos, criterios e indicadores de éxito, datos iniciales de los indicadores, recursos necesarios, necesidades formativas, identificación de mecanismos o redes existentes, métodos de supervisión del proceso de implementación, mecanismos de evaluación y redacción de informes, y plazos para el logro de objetivos <sup>2,11</sup> . |
| Adaptación de una guía | Consiste en utilizar una estrategia sistemática para usar y adaptar guías existentes, producidas en un contexto concreto, a un nuevo entorno con un contexto cultural o institucional diferente. El proceso de adaptación de una guía y sus recomendaciones debe asegurar que la guía adaptada aborde cuestiones de salud específicas, pertinentes al contexto en el que se va a utilizar, y que se amolde a las necesidades, las prioridades, la legislación, las políticas y los recursos del nuevo entorno al que                                                              |

## Lista de Comprobación de elaboración de GPC – Glosario de Términos

|                                                                    |                                                                                                                                                                                                                                                                                                                                                                                                              |
|--------------------------------------------------------------------|--------------------------------------------------------------------------------------------------------------------------------------------------------------------------------------------------------------------------------------------------------------------------------------------------------------------------------------------------------------------------------------------------------------|
|                                                                    | va destinado. <sup>12</sup>                                                                                                                                                                                                                                                                                                                                                                                  |
| Procedimientos grupales                                            | Los procedimientos grupales abarcan el cómo y el cuándo deben interactuar los miembros de un grupo. Por ejemplo, la interacción de los miembros del panel durante una reunión para acordar las recomendaciones. <sup>3</sup>                                                                                                                                                                                 |
| Métodos de consenso                                                | Se trata de las técnicas empleadas en la toma de decisiones para alcanzar un acuerdo respecto a un asunto concreto. El consenso puede ser formal o informal; algunos ejemplos de consenso formal son el método Delphi y la técnica de grupo nominal.                                                                                                                                                         |
| Quórum                                                             | Hace referencia al número mínimo de miembros del grupo que debe estar presente para considerar válidos una reunión, una votación o un consenso. <sup>1</sup>                                                                                                                                                                                                                                                 |
| Logros                                                             | Se define como las etapas importantes alcanzadas a lo largo del proceso de desarrollo de una guía. Algunos ejemplos son: finalizar la revisión sistemática, desarrollar recomendaciones y publicar un informe de la guía <sup>3</sup> .                                                                                                                                                                      |
| <b><i>Aspectos a tener en cuenta en el desarrollo de guías</i></b> |                                                                                                                                                                                                                                                                                                                                                                                                              |
| Declaración de intereses<br>(o revelación de intereses)            | Una declaración de intereses consiste en revelar el conflicto de intereses, actuales o potenciales, de naturaleza económica, profesional, intelectual u otra, pertinentes respecto al tema de la obra o la reunión, con el fin de determinar el posible conflicto de intereses. Esta declaración debe incluir también intereses relevantes de otras personas que puedan, o pueda parecer que pueden, influir |



## Lista de Comprobación de elaboración de GPC – Glosario de Términos

|                        |                                                                                                                                                                                                                                                                                                                                                                                                                                                                                                                                                                                                                                                                                         |
|------------------------|-----------------------------------------------------------------------------------------------------------------------------------------------------------------------------------------------------------------------------------------------------------------------------------------------------------------------------------------------------------------------------------------------------------------------------------------------------------------------------------------------------------------------------------------------------------------------------------------------------------------------------------------------------------------------------------------|
|                        | indebidamente en el criterio del experto; es decir, parientes directos, jefes, socios profesionales cercanos o cualquier persona con la que el experto tenga intereses personales, económicos o profesionales comunes. <sup>2</sup>                                                                                                                                                                                                                                                                                                                                                                                                                                                     |
| Conflicto de intereses | Se engloban aquí las divergencias, entre los intereses privados de una persona y sus obligaciones profesionales, que podrían llevar a un observador independiente a sospechas razonables de que las acciones o decisiones profesionales de la persona en cuestión están motivadas por un beneficio personal, ya sea económico, de promoción académica, como suministros clínicos o prestigio dentro de la comunidad. Esta definición abarca cualquier relación económica o intelectual que pueda alterar la capacidad de un individuo o una organización para abordar una pregunta científica con una mentalidad abierta. . <sup>13</sup>                                               |
| Patrocinio comercial   | Se puede aplicar a individuos u organizaciones, incluyendo la financiación para la elaboración de una guía. Despierta una especial preocupación la posibilidad de que los elaboradores de la guía se sientan, o se pueda interpretar que están, obligados o presionados por el patrocinador a hacer recomendaciones en favor de los intereses del mismo. El patrocinio comercial puede darse en forma de investigación patrocinada por la industria farmacéutica, servicios clínicos por los cuales un miembro del comité obtenga un porcentaje sustancial de sus ingresos, asesoramiento o pertenencia a un consejo por el que se recibe cualquier tipo de compensación. <sup>14</sup> |

## Lista de Comprobación de elaboración de GPC – Glosario de Términos

|                         |                                                                                                                                                                                                                                                                                                                                                                                                                                                                                                                                                                                                                                                                                                                                                                                                                                                                                         |
|-------------------------|-----------------------------------------------------------------------------------------------------------------------------------------------------------------------------------------------------------------------------------------------------------------------------------------------------------------------------------------------------------------------------------------------------------------------------------------------------------------------------------------------------------------------------------------------------------------------------------------------------------------------------------------------------------------------------------------------------------------------------------------------------------------------------------------------------------------------------------------------------------------------------------------|
| Barreras para el cambio | <p>Este aspecto deberá identificarse y considerarse antes de la elaboración de una guía donde las recomendaciones sugieran cambios en la práctica de la salud. Estas barreras para el cambio pueden existir en varios niveles del sistema de salud y pueden ser a nivel estructural (como falta de recursos, efecto disuasorio en la financiación), del propio centro (como combinación de aptitudes inadecuada, falta de instalaciones o equipamiento), de los colegas (normas asistenciales locales no acordes a la práctica deseada), de la interacción entre el profesional y el paciente (como los problemas de comunicación y procesamiento de la información) y prioridades conflictivas. Existen varios métodos para identificar estas barreras cuyo protocolo varía. Estas barreras pueden variar en función de los recursos, el contexto y guías diferentes.<sup>11</sup></p> |
| Equidad (en salud)      | <p>La equidad en salud, o equidad en relación con la salud, es una medida del grado en que las políticas de salud son capaces de distribuir de manera justa el bienestar. Consiste en la ausencia de diferencias sistemáticas o potencialmente remediabiles, en cuanto al estatus de salud, el acceso a la sanidad y a entornos saludables, y el tratamiento de uno o más aspectos de salud; entre las poblaciones o grupos de población definidos por características sociales, económicas, demográficas o geográficas. La inequidad en salud es el resultado de un desequilibrio en el estatus de salud y en el acceso a los servicios de salud entre distintas clases sociales, grupos étnicos y poblaciones de áreas geográficas distintas. Los paneles de guías deben considerar si sus recomendaciones tendrán un impacto en la</p>                                               |

## Lista de Comprobación de elaboración de GPC – Glosario de Términos

|                        |                                                                                                                                                                                                                                                                                                                                                                                                                                                                                                                                                                                                                                                                                                                                                                                                                                                                                                                                                                                                                   |
|------------------------|-------------------------------------------------------------------------------------------------------------------------------------------------------------------------------------------------------------------------------------------------------------------------------------------------------------------------------------------------------------------------------------------------------------------------------------------------------------------------------------------------------------------------------------------------------------------------------------------------------------------------------------------------------------------------------------------------------------------------------------------------------------------------------------------------------------------------------------------------------------------------------------------------------------------------------------------------------------------------------------------------------------------|
|                        | equidad en salud, y la magnitud de éste. Denominada también como desigualdad en salud. <sup>1,10,15</sup>                                                                                                                                                                                                                                                                                                                                                                                                                                                                                                                                                                                                                                                                                                                                                                                                                                                                                                         |
| Valores y preferencias | Se incluyen aquí los conocimientos, la actitud, las expectativas y las creencias de pacientes y cuidadores; las metas de los y las pacientes en cuanto a la vida y la salud; la experiencia previa con el tratamiento y la afección; la sintomatología (disnea, dolor, pérdida de peso); preferencias en cuanto a resultados deseables y no deseables; la percepción de las repercusiones que la afección o las intervenciones tengan en la calidad de vida, el bienestar o la satisfacción y las interacciones entre la labor de implementar la intervención, la propia intervención y otros contextos que pueda percibir el paciente; preferencias en cuanto a vías de acción alternativas; y preferencias relacionadas con el estilo y el contenido de la comunicación, con la información y con la participación en la toma de decisiones y la asistencia. Los valores y preferencias de aquellos a los que afecten las recomendaciones deben integrarse en el proceso de desarrollo de la guía. <sup>5</sup> |
| Transparencia          | La transparencia implica documentar y presentar de manera clara los detalles de la totalidad de los métodos y procesos utilizados para la elaboración de la guía, incluyendo los participantes en el mismo, la evidencia y la información examinada y los juicios realizados durante cualquier toma de decisiones, especialmente durante la formulación de las recomendaciones. La transparencia permitirá que otras personas sigan los pasos y obtengan el mismo producto final, si reproducen el proceso de desarrollo de la guía.                                                                                                                                                                                                                                                                                                                                                                                                                                                                              |

## Lista de Comprobación de elaboración de GPC – Glosario de Términos

|                                                                                   |                                                                                                                                                                                                                                                                                                                                                                                                                                                                                                                     |
|-----------------------------------------------------------------------------------|---------------------------------------------------------------------------------------------------------------------------------------------------------------------------------------------------------------------------------------------------------------------------------------------------------------------------------------------------------------------------------------------------------------------------------------------------------------------------------------------------------------------|
|                                                                                   |                                                                                                                                                                                                                                                                                                                                                                                                                                                                                                                     |
| Credibilidad de las guías                                                         | El grado en que se puede confiar en las conclusiones y recomendaciones de una guía. Determinado por los métodos y enfoques utilizados, incluyendo el tiempo y la dependencia editorial tal como se describe en la herramienta AGREE II, en el informe del ‘Institute of Medicine’s’ y en la guía del ‘Guideline International Network’. También puede ser denominado como fiabilidad o la calidad de guías. <sup>4,16, 17</sup>                                                                                     |
| <b><i>Revisión de la evidencia y consideraciones de información adicional</i></b> |                                                                                                                                                                                                                                                                                                                                                                                                                                                                                                                     |
| Protocolo                                                                         | Documento que describe el plan o el conjunto de pasos que definen cómo se desarrollará la guía y qué metodología se utilizará. Antes de desarrollar una guía, por ejemplo, el protocolo establece qué preguntas serán respondidas, cómo se recogerá y analizará la información, así como el marco conceptual y métodos de consenso que se utilizarán para formular las recomendaciones.                                                                                                                             |
| Pregunta en formato PICO                                                          | Población/pacientes-intervención- comparación- desenlaces (outcomes). Mnemotecnía utilizada para desarrollar las preguntas sobre cuidados en salud que serán respondidas en una guía. Una pregunta generada utilizando la estrategia PICO ayudará a identificar la evidencia a revisar, siendo útil para obtener información sobre los pacientes y su condición, las intervenciones de interés que se realizan o debieran realizarse, cualquier comparación entre la intervención actual y posibles alternativas, y |

## Lista de Comprobación de elaboración de GPC – Glosario de Términos

|                                  |                                                                                                                                                                                                                                                                                                                                                                                                                                                                                                 |
|----------------------------------|-------------------------------------------------------------------------------------------------------------------------------------------------------------------------------------------------------------------------------------------------------------------------------------------------------------------------------------------------------------------------------------------------------------------------------------------------------------------------------------------------|
|                                  | los desenlaces deseados o logrados. <sup>2</sup>                                                                                                                                                                                                                                                                                                                                                                                                                                                |
| Población                        | Un grupo de personas con un vínculo en común, como presentar una misma condición médica, vivir en una misma área o compartir características comunes. La población identificada para una guía se refiere a todas las personas a las que se pretende aplicar las recomendaciones (ej. adultos con diabetes mellitus). <sup>18</sup>                                                                                                                                                              |
| Comorbilidad                     | Enfermedad o condición que presenta un paciente además de la enfermedad principal de interés que se está estudiando o tratando (ej. enfermedad pulmonar obstructiva crónica y diabetes mellitus). Las comorbilidades pueden influenciar sobre las manifestaciones clínicas y la historia natural de una enfermedad. Denominadas también, como condiciones concomitantes. <sup>6,19</sup>                                                                                                        |
| Vía clínica (o vía de cuidados): | Secuencia de prácticas, procedimientos, pruebas/ exámenes, intervenciones y tratamientos que debieran ser utilizados para proveer cuidados en salud a personas con un cuadro clínico determinado. <sup>6</sup>                                                                                                                                                                                                                                                                                  |
| Desenlaces                       | El impacto que una prueba, tratamiento, política, programa u otra intervención tiene sobre una persona, grupo o población. Los desenlaces de intervenciones para mejorar la salud de la población podrían incluir un cambio en la salud y en el bienestar, o en el estado de salud de las personas. En términos clínicos, los desenlaces pueden incluir el número de pacientes que se recuperan completamente de una enfermedad o el número de hospitalizaciones, y la mejora o deterioro en la |

## Lista de Comprobación de elaboración de GPC – Glosario de Términos

|                                          |                                                                                                                                                                                                                                                                                                                                                                                                                                                                                                              |
|------------------------------------------|--------------------------------------------------------------------------------------------------------------------------------------------------------------------------------------------------------------------------------------------------------------------------------------------------------------------------------------------------------------------------------------------------------------------------------------------------------------------------------------------------------------|
|                                          | salud, habilidades funcionales, síntomas o situación de algunas personas. <sup>6</sup>                                                                                                                                                                                                                                                                                                                                                                                                                       |
| Desenlaces importantes para pacientes    | Un desenlace para el que se responde con un sí la siguiente pregunta: “si uno supiera que este desenlace es lo único que va a cambiar con el tratamiento, ¿consideraría el paciente recibir el tratamiento aunque estuviera asociado con efectos adversos, molestias/ incomodidades, o coste?”. Dentro de estos desenlaces se encuentran la mortalidad, morbilidad, y los desenlaces declarados por pacientes. <sup>20,21</sup>                                                                              |
| Calidad de vida relacionada con la salud | Combinación del bienestar físico, mental y social de una persona, y no sólo la ausencia de enfermedad. Es un ejemplo de desenlace importante para pacientes. <sup>1</sup>                                                                                                                                                                                                                                                                                                                                    |
| Desenlaces subrogados                    | Aquellos desenlaces que no son importantes en sí mismos pero que pueden estar correlacionados con desenlaces importantes para pacientes (ej. densidad ósea como desenlace subrogado del desenlace importante para pacientes, como por ejemplo fracturas). También llamados desenlaces sustitutos o indirectos. <sup>21</sup>                                                                                                                                                                                 |
| Importancia de los desenlaces            | Clasificar la importancia relativa de los desenlaces deseables (ej, reducción de mortalidad, mejora en la calidad de vida relacionada con la salud) e indeseables (ej, efectos adversos y coste) de la intervención de interés permite al panel de la guía determinar cuál es la influencia que tendrá un desenlace en particular y sus estimadores de efecto en la formulación de una recomendación en particular. La importancia relativa de los desenlaces puede variar de acuerdo a diferentes valores y |

## Lista de Comprobación de elaboración de GPC – Glosario de Términos

|                             |                                                                                                                                                                                                                                                                                                                                                                                                     |
|-----------------------------|-----------------------------------------------------------------------------------------------------------------------------------------------------------------------------------------------------------------------------------------------------------------------------------------------------------------------------------------------------------------------------------------------------|
|                             | preferencias o cuando se considera desde la perspectiva de pacientes, clínicos y encargados de políticas de salud. En el marco conceptual GRADE, los desenlaces son clasificados como críticos para la toma de decisiones, importantes pero no críticos para la toma de decisiones, y de baja importancia para la toma de decisiones. <sup>21</sup>                                                 |
| Magnitud del efecto         | Medida de la diferencia o del efecto relativo de una intervención sobre el desenlace de interés en el grupo intervención comparado con el grupo control. También, conocido por tamaño del efecto. <sup>6</sup>                                                                                                                                                                                      |
| Revisión sistemática        | Revisión exhaustiva de la literatura publicada en relación a un tema de cuidados en salud y que responde a una pregunta específica. Se lleva acabo una búsqueda de literatura amplia, basada en una estrategia de búsqueda para identificar todos los estudios. Los estudios son revisados, se evalúa su calidad, y los resultados se resumen de acuerdo a la pregunta de la revisión. <sup>2</sup> |
| Recolección de la evidencia | En el contexto de revisiones sistemáticas, el proceso de buscar sistemáticamente todos los estudios científicos relevantes a una pregunta concreta, y recuperarlos para su revisión. Este proceso también incluye obtener de otras fuentes evidencia no publicada <sup>2</sup>                                                                                                                      |
| Criterios de selección      | Criterios utilizados para decidir qué estudios y tipos de estudios deberían ser incluidos y excluidos como fuente potencial a la hora de recoger la evidencia durante la elaboración de una guía. También, llamados criterios de inclusión y exclusión. <sup>6</sup>                                                                                                                                |

## Lista de Comprobación de elaboración de GPC – Glosario de Términos

|                                                              |                                                                                                                                                                                                                                                                                                                                                                                                                                                                                                                                                                       |
|--------------------------------------------------------------|-----------------------------------------------------------------------------------------------------------------------------------------------------------------------------------------------------------------------------------------------------------------------------------------------------------------------------------------------------------------------------------------------------------------------------------------------------------------------------------------------------------------------------------------------------------------------|
| Opinión de expertos                                          | Se trata de una interpretación de la evidencia. Algunas veces se basa en evidencia de alta calidad como ensayos clínicos aleatorizados o estudios observacionales bien realizados, y otras veces se basa en información recogida de forma no sistemática, e idealmente resumida por escrito. La opinión de expertos se confunde a menudo con la noción de evidencia que no está disponible a partir de investigación sistemática o que no fue resumida de forma sistemática. A menudo, también se utiliza como excusa para no recoger evidencia de forma sistemática. |
| Evaluación económica                                         | Conjunto de métodos cuantitativos formales utilizados para evaluar una o más intervenciones, programas o estrategias en relación con su utilización de recursos y sus desenlaces esperados. Las evaluaciones económicas pueden incluir distintos tipos de estudios como el análisis de coste efectividad, el análisis de coste beneficio y los modelos económicos. <sup>2</sup>                                                                                                                                                                                       |
| Calidad de la evidencia                                      | Describe el nivel de confianza o certidumbre en los estimadores de efecto de una intervención en un desenlace específico en una población determinada. También, llamado fuerza de la evidencia, confianza en los estimadores, certidumbre en la evidencia, y niveles de evidencia. <sup>22</sup>                                                                                                                                                                                                                                                                      |
| Tabla o perfil de evidencia, o tabla de resumen de hallazgos | Tabla que resume los resultados/ estimadores de efecto de los estudios para cada desenlace de interés y la calidad de la evidencia asociada. La tabla proporciona un resumen conciso de la información clave necesaria para tomar una decisión, y en el contexto de una guía, provee un resumen de la información clave que subyace a una recomendación. <sup>6,23</sup>                                                                                                                                                                                              |



## Lista de Comprobación de elaboración de GPC – Glosario de Términos

| <b>Recomendaciones y formulación de recomendaciones</b> |                                                                                                                                                                                                                                                                                                                                                                                                                                                                                                                                                                            |
|---------------------------------------------------------|----------------------------------------------------------------------------------------------------------------------------------------------------------------------------------------------------------------------------------------------------------------------------------------------------------------------------------------------------------------------------------------------------------------------------------------------------------------------------------------------------------------------------------------------------------------------------|
| Estrategia analítica o marco conceptual                 | Estrategia que describe los criterios que usa el panel de la guía para revisar la evidencia y analizar la información relevante para llegar a una recomendación. El análisis puede centrarse en el balance entre consecuencias deseables e indeseables, informadas por la calidad de la evidencia, la magnitud de la diferencia entre los beneficios y daños, la certidumbre en la variabilidad de los valores y preferencias, el uso de recursos, la equidad y otros factores (ej. Marco conceptual de la evidencia a las recomendaciones de GRADE/ DECIDE) <sup>24</sup> |
| Recomendación                                           | Curso de acción recomendado por la guía, basado en preguntas clínicas, recolección de evidencia, y consideración de otra información de la estrategia analítica o marco conceptual. Las recomendaciones en la guías pueden estar relacionadas con intervenciones clínicas, actividades de salud pública o políticas de gobierno. <sup>2</sup>                                                                                                                                                                                                                              |
| Recomendación condicional                               | Recomendación para la que el panel de la guía tuvo mayor incertidumbre sobre si la implementación de la acción recomendada conlleva más consecuencias deseables que indeseables. Condiciones específicas tendrían que ser descritas. En el marco conceptual GRADE se le llama recomendación débil. <sup>25</sup>                                                                                                                                                                                                                                                           |

## Lista de Comprobación de elaboración de GPC – Glosario de Términos

|                                                                |                                                                                                                                                                                                                                                                                                                                                                                                                                                                                                                                                                                                                                                                                                                                                                                                                                        |
|----------------------------------------------------------------|----------------------------------------------------------------------------------------------------------------------------------------------------------------------------------------------------------------------------------------------------------------------------------------------------------------------------------------------------------------------------------------------------------------------------------------------------------------------------------------------------------------------------------------------------------------------------------------------------------------------------------------------------------------------------------------------------------------------------------------------------------------------------------------------------------------------------------------|
| Recomendación de investigación                                 | Recomendación que resulta del proceso de desarrollo de la guía para ser utilizada en el contexto de investigación únicamente. Los paneles de guías deberían considerar realizar recomendaciones de investigación cuando haya una gran incertidumbre sobre los efectos deseables e indeseables de una intervención, nuevas investigaciones puedan disminuir la incertidumbre, y que los beneficios potenciales y ahorros, derivados de la reducción de esta incertidumbre, sean mayores que los daños potenciales de no hacer la recomendación de investigación. La formulación de recomendaciones para investigación adicional debe ser lo más precisa y específica posible. Definir la población, intervención, comparación y desenlaces (PICO) explícitamente hace las recomendaciones de investigación más útiles. <sup>24,26</sup> |
| Fuerza de la recomendación                                     | La fuerza de una recomendación refleja el grado en que los elaboradores de la guía confían en que los efectos deseables de adherirse a la recomendación superan los efectos indeseables. <sup>24,25</sup>                                                                                                                                                                                                                                                                                                                                                                                                                                                                                                                                                                                                                              |
| Medidas de rendimiento                                         | Criterios que pueden ser medidos para evaluar la calidad de los cuidados en salud (ej. profesionales clínicos siguiendo una opción de manejo específico). Las opciones de manejo asociadas con recomendaciones fuertes son particularmente buenos candidatos para los criterios de calidad. <sup>24</sup>                                                                                                                                                                                                                                                                                                                                                                                                                                                                                                                              |
| <b><i>Acrónimos utilizados en la lista de comprobación</i></b> |                                                                                                                                                                                                                                                                                                                                                                                                                                                                                                                                                                                                                                                                                                                                                                                                                                        |
| AGREE II                                                       | Valoración de guías para investigación y evaluación II (del inglés: <i>Appraisal of Guidelines for Research and Evaluation II</i> ). Herramienta validada desarrollada a través de una colaboración                                                                                                                                                                                                                                                                                                                                                                                                                                                                                                                                                                                                                                    |

## Lista de Comprobación de elaboración de GPC – Glosario de Términos

|        |                                                                                                                                                                                                                                                                                                                                                                                                                                                                                                                           |
|--------|---------------------------------------------------------------------------------------------------------------------------------------------------------------------------------------------------------------------------------------------------------------------------------------------------------------------------------------------------------------------------------------------------------------------------------------------------------------------------------------------------------------------------|
|        | internacional para evaluar el proceso de desarrollo de guías de práctica clínica y la calidad de su descripción. <sup>16</sup>                                                                                                                                                                                                                                                                                                                                                                                            |
| AMSTAR | Una herramienta de medición para evaluar revisiones sistemáticas (del inglés: <i>A Measurement Tool to Assess Systematic Reviews</i> ). Herramienta validada con 11 ítems para medir la calidad metodológica de revisiones sistemáticas. <sup>27</sup>                                                                                                                                                                                                                                                                    |
| GRADE  | De sus siglas en inglés: Grading of Recommendations Assessment, Development and Evaluation approach; Desarrollado por un grupo de trabajo colaborativo internacional, GRADE es un sistema que provee un enfoque transparente para clasificar la calidad de la evidencia y la fuerza de las recomendaciones, que es utilizado por muchas organizaciones internacionales. Aborda asuntos metodológicos y prácticos relacionados con revisiones sistemáticas y el desarrollo y la difusión de recomendaciones. <sup>28</sup> |
| USPSTF | Grupo de Trabajo de Servicios Preventivos de los EE.UU (del inglés: United States Preventive Services Task Force). Organización gubernamental que desarrolla recomendaciones sobre servicios clínicos preventivos como tamizaje, servicios de asesoramiento y medicinas preventivas. La organización desarrolló su propio marco conceptual para clasificar la calidad de la evidencia y graduar la fuerza de las recomendaciones. <sup>29</sup>                                                                           |

## Lista de Verificación de elaboración de GPC – Glosario de Términos

### Bibliografía:

1. National Institute for Health and Clinical Excellence. The guidelines manual: Appendix L – Abbreviations and Glossary. 2012; <http://publications.nice.org.uk/the-guidelines-manual-appendix-l-abbreviations-and-glossary-pmg6d/12-glossary>. Accessed July 21, 2013.
2. World Health Organization. Estonian Handbook for Guidelines Development. 2011; [http://whqlibdoc.who.int/publications/2011/9789241502429\\_eng.pdf](http://whqlibdoc.who.int/publications/2011/9789241502429_eng.pdf). Accessed April 22, 2013.
3. Kunz R, Fretheim A, Cluzeau F, Wilt TJ, Qaseem A, Lelgemann M, et al. Guideline Group Composition and Group Processes: Article 3 in Integrating and Coordinating Efforts in COPD Guideline Development. An Official ATS/ERS Workshop Report. *Proceedings of the American Thoracic Society*. 2012;9:229-233.
4. Institute of Medicine Committee on Standards for Developing Trustworthy Clinical Practice Guidelines. Clinical Practice Guidelines We Can Trust. 2011; [http://www.nap.edu/openbook.php?record\\_id=13058](http://www.nap.edu/openbook.php?record_id=13058). Accessed April 22, 2013.
5. Kelson M, Akl EA, Bastian H, Cluzeau F, Curtis JR, Guyatt G, et al. Integrating Values and Consumer Involvement in Guidelines with the Patient at the Center: Article 8 in Integrating and Coordinating Efforts in COPD Guideline Development. An Official ATS/ERS Workshop Report. *Proceedings of the American Thoracic Society*. 2012;9:262-268.

## Lista de Verificación de elaboración de GPC – Glosario de Términos

6. National Institute for Health and Clinical Excellence. Glossary. 2013; <http://www.nice.org.uk/website/glossary/glossary.jsp>. Accessed July 21, 2013.
7. National Health and Medical Research Council. Procedures and requirements for meeting the 2011 NHMRC standard for clinical practice guidelines. 2011; <http://www.nhmrc.gov.au/guidelines/publications/cp133-and-cp133a>. Accessed April 22, 2013.
8. Yawn BP, Akl EA, Qaseem A, Black P, Campos-Outcalt D. Identifying Target Audiences: Who Are the Guidelines For?: Article 1 in Integrating and Coordinating Efforts in COPD Guideline Development. An Official ATS/ERS Workshop Report. *Proceedings of the American Thoracic Society*. 2012;9:219-224.
9. Atkins D, Perez-Padilla R, MacNee W, Buist AS, Cruz AA. Priority Setting in Guideline Development: Article 2 in Integrating and Coordinating Efforts in COPD Guideline Development. An Official ATS/ERS Workshop Report. *Proceedings of the American Thoracic Society*. 2012;9:225-228.
10. World Health Organization. Health Systems Strengthening Glossary. 2013; [http://www.who.int/healthsystems/hss\\_glossary/en/index.html](http://www.who.int/healthsystems/hss_glossary/en/index.html). Accessed July 26, 2013.
11. Grimshaw JM, Schünemann HJ, Burgers J, Cruz AA, Heffner J, Metersky M, et al. Disseminating and Implementing Guidelines: Article 13 in Integrating and Coordinating Efforts in COPD Guideline Development. An Official ATS/ERS Workshop Report. *Proceedings of the American Thoracic Society*. 2012;9:298-303.

## Lista de Verificación de elaboración de GPC – Glosario de Términos

12. The ADAPTE Collaboration. The ADAPTE Process: Resource Toolkit for Guideline Adaptation. Version 2.0. 2009; <http://www.g-i-n.net/document-store/working-groups-documents/adaptation/adapte-resource-toolkit-guideline-adaptation-2-0.pdf>. Accessed July 5, 2013.
13. Schunemann HJ, Osborne M, Moss J, Manthous C, Wagner G, Sicilian L, et al. An official American Thoracic Society Policy statement: managing conflict of interest in professional societies. *Am J Respir Crit Care Med*. Sep 15 2009;180:564-580.
14. Boyd EA, Akl EA, Baumann M, Curtis JR, Field MJ, Jaeschke R, et al. Guideline Funding and Conflicts of Interest: Article 4 in Integrating and Coordinating Efforts in COPD Guideline Development. An Official ATS/ERS Workshop Report. *Proceedings of the American Thoracic Society*. 2012;9:234-242.
15. Oxman A, Schunemann H, Fretheim A. Improving the use of research evidence in guideline development: 12. Incorporating considerations of equity. *Health Research Policy and Systems*. 2006;4:24.
16. AGREE Research Trust. The AGREE Enterprise Website. 2013; <http://www.agreetrust.org>. Accessed July 21, 2013.
17. Qaseem A, Forland F, Macbeth F, Ollenschlager G, Phillips S, van der Wees P. Guidelines International Network: Toward international standards for clinical practice guidelines. *Ann Intern Med*. 2012;156:525-531.
18. Wilt TJ, Guyatt G, Kunz R, Macnee W, Puhan MA, Vieg G, et al. Deciding What Type of Evidence and Outcomes to Include in Guidelines: Article 5 in Integrating and Coordinating Efforts in COPD Guideline Development. An

## Lista de Verificación de elaboración de GPC – Glosario de Términos

- Official ATS/ERS Workshop Report. *Proceedings of the American Thoracic Society*. 2012;9:243-250.
19. Fabbri LM, Boyd C, Boschetto P, Rabe KF, Buist AS, Yawn B, et al. How to Integrate Multiple Comorbidities in Guideline Development: Article 10 in Integrating and Coordinating Efforts in COPD Guideline Development. An Official ATS/ERS Workshop Report. *Proceedings of the American Thoracic Society*. 2012;9:274-281.
  20. Guyatt G DP, Montori V, Schünemann HJ, Bhandari M,. Putting the patient first: In our practice, and in our use of language. *ACP journal club*. Jan-Feb 2004;140(A11).
  21. Guyatt GH, Oxman AD, Kunz R, Atkins D, Brozek J, Vist G, et al. GRADE guidelines: 2. Framing the question and deciding on important outcomes. *J Clin Epidemiol*. Apr 2011;64:395-400.
  22. Balshem H, Helfand M, Schunemann HJ, Oxman AD, Kunz R, Brozek J, et al. GRADE guidelines: 3. Rating the quality of evidence. *J Clin Epidemiol*. Apr 2011;64:401-406.
  23. Guyatt G, Oxman AD, Akl EA, Kunz R, Vist G, Brozek J, et al. GRADE guidelines: 1. Introduction-GRADE evidence profiles and summary of findings tables. *J Clin Epidemiol*. Apr 2011;64:383-394.
  24. Schünemann HJ, Oxman AD, Akl EA, Brozek JL, Montori VM, Heffner J, et al. Moving from Evidence to Developing Recommendations in Guidelines: Article 11 in Integrating and Coordinating Efforts in COPD Guideline Development. An Official ATS/ERS Workshop Report. *Proceedings of the American Thoracic Society*. 2012;9:282-292.

## Lista de Verificación de elaboración de GPC – Glosario de Términos

25. Andrews J, Guyatt G, Oxman AD, Alderson P, Dahm P, Falck-Ytter Y, et al. GRADE guidelines: 14. Going from evidence to recommendations: the significance and presentation of recommendations. *Journal of clinical epidemiology*. 2013;66:719-725.
26. Brown P BK, Chalkidou K, Chalmers I, Clarke M, Fenton M, Fenton M, et al,. How to formulate research recommendations. *BMJ*. Oct 14 2006;333:804-806.
27. AMSTAR. Assessing the methodological quality of systematic reviews. 2012; <http://amstar.ca>. Accessed July 21, 2013.
28. The GRADE working group. GRADE Working Group. 2013; <http://www.gradeworkinggroup.org>. Accessed July 21, 2013.
29. U.S. Preventive Services Task Force. Methods and Processes. 2013; <http://www.uspreventiveservicestaskforce.org/methods.htm>. Accessed July 21, 2013.
